# Supplementary material for: Self-learning type-2 fuzzy systems with adaptive rule reduction for time series forecasting
Source: PeerJ journal article supplement (doi:10.7717/peerj-cs.3004), 2025-07-29
Supplement: Codemain.zip [file Codemain.zip]

## Sheet: Planilha1
1.00117	1.06931	1.16712	1.02286	1.14355
0.972488	1.05665	1.16101	1.04503	1.14473
0.934945	1.04742	1.14605	1.07571	1.14108
0.891868	1.04013	1.12631	1.11007	1.13586
0.847604	1.03223	1.10533	1.14072	1.13157
0.805984	1.02038	1.08577	1.16076	1.12984
0.769829	1.00117	1.06931	1.16712	1.13131
0.741007	0.972488	1.05665	1.16101	1.13564
0.720515	0.934945	1.04742	1.14605	1.14158
0.708467	0.891868	1.04013	1.12631	1.14704
0.704107	0.847604	1.03223	1.10533	1.14906
0.705985	0.805984	1.02038	1.08577	1.14395
0.712329	0.769829	1.00117	1.06931	1.12788
0.721531	0.741007	0.972488	1.05665	1.09886
0.732625	0.720515	0.934945	1.04742	1.05864
0.745685	0.708467	0.891868	1.04013	1.01182
0.762062	0.704107	0.847604	1.03223	0.96331
0.784257	0.705985	0.805984	1.02038	0.916753
0.814995	0.712329	0.769829	1.00117	0.874305
0.855255	0.721531	0.741007	0.972488	0.836896
0.902615	0.732625	0.720515	0.934945	0.804512
0.952124	0.745685	0.708467	0.891868	0.776436
0.999011	0.762062	0.704107	0.847604	0.751534
1.04048	0.784257	0.705985	0.805984	0.728576
1.07579	0.814995	0.712329	0.769829	0.70656
1.10557	0.855255	0.721531	0.741007	0.684977
1.13103	0.902615	0.732625	0.720515	0.663962
1.15351	0.952124	0.745685	0.708467	0.644406
1.1741	0.999011	0.762062	0.704107	0.628088
1.19353	1.04048	0.784257	0.705985	0.617878
1.21222	1.07579	0.814995	0.712329	0.61771
1.23035	1.10557	0.855255	0.721531	0.631718
1.24803	1.13103	0.902615	0.732625	0.66224
1.26531	1.15351	0.952124	0.745685	0.707827
1.28209	1.1741	0.999011	0.762062	0.763403
1.29744	1.19353	1.04048	0.784257	0.822717
1.30857	1.21222	1.07579	0.814995	0.880733
1.31046	1.23035	1.10557	0.855255	0.934421
1.29815	1.24803	1.13103	0.902615	0.982375
1.27015	1.26531	1.15351	0.952124	1.02415
1.2289	1.28209	1.1741	0.999011	1.05975
1.17851	1.29744	1.19353	1.04048	1.08933
1.12281	1.30857	1.21222	1.07579	1.11314
1.0646	1.31046	1.23035	1.10557	1.13151
1.00574	1.29815	1.24803	1.13103	1.14498
0.947416	1.27015	1.26531	1.15351	1.15443
0.890342	1.2289	1.28209	1.1741	1.16122
0.834998	1.17851	1.29744	1.19353	1.16734
0.781706	1.12281	1.30857	1.21222	1.17528
0.730679	1.0646	1.31046	1.23035	1.18747
0.682051	1.00574	1.29815	1.24803	1.20506
0.635916	0.947416	1.27015	1.26531	1.22653
0.59241	0.890342	1.2289	1.28209	1.24691
0.551876	0.834998	1.17851	1.29744	1.25912
0.51501	0.781706	1.12281	1.30857	1.25728
0.482934	0.730679	1.0646	1.31046	1.23941
0.457243	0.682051	1.00574	1.29815	1.20735
0.440142	0.635916	0.947416	1.27015	1.16483
0.434621	0.59241	0.890342	1.2289	1.11582
0.444329	0.551876	0.834998	1.17851	1.06367
0.472644	0.51501	0.781706	1.12281	1.01095
0.520635	0.482934	0.730679	1.0646	0.959472
0.585024	0.457243	0.682051	1.00574	0.910385
0.658408	0.440142	0.635916	0.947416	0.864242
0.732193	0.434621	0.59241	0.890342	0.820985
0.799614	0.444329	0.551876	0.834998	0.779964
0.856805	0.472644	0.51501	0.781706	0.740115
0.902313	0.520635	0.482934	0.730679	0.700438
0.936183	0.585024	0.457243	0.682051	0.660599
0.959247	0.658408	0.440142	0.635916	0.621265
0.972724	0.732193	0.434621	0.59241	0.583898
0.978048	0.799614	0.444329	0.551876	0.550347
0.976825	0.856805	0.472644	0.51501	0.522667
0.970858	0.902313	0.520635	0.482934	0.503238
0.962216	0.936183	0.585024	0.457243	0.494946
0.953348	0.959247	0.658408	0.440142	0.501046
0.947167	0.972724	0.732193	0.434621	0.524302
0.946938	0.978048	0.799614	0.444329	0.565378
0.95577	0.976825	0.856805	0.472644	0.621504
0.975641	0.970858	0.902313	0.520635	0.686918
1.00622	0.962216	0.936183	0.585024	0.755012
1.04391	0.953348	0.959247	0.658408	0.820335
1.08206	0.947167	0.972724	0.732193	0.879299
1.1135	0.946938	0.978048	0.799614	0.929865
1.13402	0.95577	0.976825	0.856805	0.971003
1.14355	0.975641	0.970858	0.902313	1.00237
1.14473	1.00622	0.962216	0.936183	1.02422
1.14108	1.04391	0.953348	0.959247	1.03737
1.13586	1.08206	0.947167	0.972724	1.04313
1.13157	1.1135	0.946938	0.978048	1.04319
1.12984	1.13402	0.95577	0.976825	1.0396
1.13131	1.14355	0.975641	0.970858	1.03478
1.13564	1.14473	1.00622	0.962216	1.03158
1.14158	1.14108	1.04391	0.953348	1.03304
1.14704	1.13586	1.08206	0.947167	1.04198
1.14906	1.13157	1.1135	0.946938	1.0601
1.14395	1.12984	1.13402	0.95577	1.08697
1.12788	1.13131	1.14355	0.975641	1.11907
1.09886	1.13564	1.14473	1.00622	1.14977
1.05864	1.14158	1.14108	1.04391	1.17148
1.01182	1.14704	1.13586	1.08206	1.17932
0.96331	1.14906	1.13157	1.1135	1.17299
0.916753	1.14395	1.12984	1.13402	1.15562
0.874305	1.12788	1.13131	1.14355	1.13151
0.836896	1.09886	1.13564	1.14473	1.10464
0.804512	1.05864	1.14158	1.14108	1.07814
0.776436	1.01182	1.14704	1.13586	1.05413
0.751534	0.96331	1.14906	1.13157	1.03378
0.728576	0.916753	1.14395	1.12984	1.0172
0.70656	0.874305	1.12788	1.13131	1.00343
0.684977	0.836896	1.09886	1.13564	0.990407
0.663962	0.804512	1.05864	1.14158	0.975208
0.644406	0.776436	1.01182	1.14704	0.954655
0.628088	0.751534	0.96331	1.14906	0.926452
0.617878	0.728576	0.916753	1.14395	0.890488
0.61771	0.70656	0.874305	1.12788	0.849187
0.631718	0.684977	0.836896	1.09886	0.806372
0.66224	0.663962	0.804512	1.05864	0.765817
0.707827	0.644406	0.776436	1.01182	0.73058
0.763403	0.628088	0.751534	0.96331	0.702968
0.822717	0.617878	0.728576	0.916753	0.684572
0.880733	0.61771	0.70656	0.874305	0.676166
0.934421	0.631718	0.684977	0.836896	0.677547
0.982375	0.66224	0.663962	0.804512	0.687539
1.02415	0.707827	0.644406	0.776436	0.704297
1.05975	0.763403	0.628088	0.751534	0.72584
1.08933	0.822717	0.617878	0.728576	0.750622
1.11314	0.880733	0.61771	0.70656	0.777979
1.13151	0.934421	0.631718	0.684977	0.808336
1.14498	0.982375	0.66224	0.663962	0.842969
1.15443	1.02415	0.707827	0.644406	0.883041
1.16122	1.05975	0.763403	0.628088	0.928037
1.16734	1.08933	0.822717	0.617878	0.974971
1.17528	1.11314	0.880733	0.61771	1.01968
1.18747	1.13151	0.934421	0.631718	1.05894
1.20506	1.14498	0.982375	0.66224	1.09145
1.22653	1.15443	1.02415	0.707827	1.11754
1.24691	1.16122	1.05975	0.763403	1.13861
1.25912	1.16734	1.08933	0.822717	1.15642
1.25728	1.17528	1.11314	0.880733	1.17275
1.23941	1.18747	1.13151	0.934421	1.18899
1.20735	1.20506	1.14498	0.982375	1.20598
1.16483	1.22653	1.15443	1.02415	1.22397
1.11582	1.24691	1.16122	1.05975	1.24268
1.06367	1.25912	1.16734	1.08933	1.26137
1.01095	1.25728	1.17528	1.11314	1.27881
0.959472	1.23941	1.18747	1.13151	1.29294
0.910385	1.20735	1.20506	1.14498	1.30036
0.864242	1.16483	1.22653	1.15443	1.29646
0.820985	1.11582	1.24691	1.16122	1.27756
0.779964	1.06367	1.25912	1.16734	1.24359
0.740115	1.01095	1.25728	1.17528	1.19793
0.700438	0.959472	1.23941	1.18747	1.14505
0.660599	0.910385	1.20735	1.20506	1.08875
0.621265	0.864242	1.16483	1.22653	1.03162
0.583898	0.820985	1.11582	1.24691	0.975157
0.550347	0.779964	1.06367	1.25912	0.920054
0.522667	0.740115	1.01095	1.25728	0.866547
0.503238	0.700438	0.959472	1.23941	0.814658
0.494946	0.660599	0.910385	1.20735	0.764392
0.501046	0.621265	0.864242	1.16483	0.715828
0.524302	0.583898	0.820985	1.11582	0.669151
0.565378	0.550347	0.779964	1.06367	0.624642
0.621504	0.522667	0.740115	1.01095	0.582708
0.686918	0.503238	0.700438	0.959472	0.543951
0.755012	0.494946	0.660599	0.910385	0.509305
0.820335	0.501046	0.621265	0.864242	0.480163
0.879299	0.524302	0.583898	0.820985	0.458506
0.929865	0.565378	0.550347	0.779964	0.447051
0.971003	0.621504	0.522667	0.740115	0.449216
1.00237	0.686918	0.503238	0.700438	0.468502
1.02422	0.755012	0.494946	0.660599	0.50693
1.03737	0.820335	0.501046	0.621265	0.563099
1.04313	0.879299	0.524302	0.583898	0.631571
1.04319	0.929865	0.565378	0.550347	0.704609
1.0396	0.971003	0.621504	0.522667	0.774921
1.03478	1.00237	0.686918	0.503238	0.837384
1.03158	1.02422	0.755012	0.494946	0.889288
1.03304	1.03737	0.820335	0.501046	0.929766
1.04198	1.04313	0.879299	0.524302	0.959106
1.0601	1.04319	0.929865	0.565378	0.978241
1.08697	1.0396	0.971003	0.621504	0.988442
1.11907	1.03478	1.00237	0.686918	0.9912
1.14977	1.03158	1.02422	0.755012	0.988202
1.17148	1.03304	1.03737	0.820335	0.981392
1.17932	1.04198	1.04313	0.879299	0.973058
1.17299	1.0601	1.04319	0.929865	0.965928
1.15562	1.08697	1.0396	0.971003	0.96313
1.13151	1.11907	1.03478	1.00237	0.967849
1.10464	1.14977	1.03158	1.02422	0.982576
1.07814	1.17148	1.03304	1.03737	1.00807
1.05413	1.17932	1.04198	1.04313	1.04232
1.03378	1.17299	1.0601	1.04319	1.07994
1.0172	1.15562	1.08697	1.0396	1.11344
1.00343	1.13151	1.11907	1.03478	1.13675
0.990407	1.10464	1.14977	1.03158	1.14792
0.975208	1.07814	1.17148	1.03304	1.14873
0.954655	1.05413	1.17932	1.04198	1.1427
0.926452	1.03378	1.17299	1.0601	1.13349
0.890488	1.0172	1.15562	1.08697	1.12411
0.849187	1.00343	1.13151	1.11907	1.11675
0.806372	0.990407	1.10464	1.14977	1.11262
0.765817	0.975208	1.07814	1.17148	1.1119
0.73058	0.954655	1.05413	1.17932	1.11379
0.702968	0.926452	1.03378	1.17299	1.11647
0.684572	0.890488	1.0172	1.15562	1.11724
0.676166	0.849187	1.00343	1.13151	1.11262
0.677547	0.806372	0.990407	1.10464	1.09882
0.687539	0.765817	0.975208	1.07814	1.07317
0.704297	0.73058	0.954655	1.05413	1.03614
0.72584	0.702968	0.926452	1.03378	0.99148
0.750622	0.684572	0.890488	1.0172	0.944132
0.777979	0.676166	0.849187	1.00343	0.89822
0.808336	0.677547	0.806372	0.990407	0.85646
0.842969	0.687539	0.765817	0.975208	0.820303
0.883041	0.704297	0.73058	0.954655	0.790173
0.928037	0.72584	0.702968	0.926452	0.765655
0.974971	0.750622	0.684572	0.890488	0.745706
1.01968	0.777979	0.676166	0.849187	0.728942
1.05894	0.808336	0.677547	0.806372	0.713997
1.09145	0.842969	0.687539	0.765817	0.699884
1.11754	0.883041	0.704297	0.73058	0.686282
1.13861	0.928037	0.72584	0.702968	0.673736
1.15642	0.974971	0.750622	0.684572	0.663819
1.17275	1.01968	0.777979	0.676166	0.659294
1.18899	1.05894	0.808336	0.677547	0.664047
1.20598	1.09145	0.842969	0.687539	0.682135
1.22397	1.11754	0.883041	0.704297	0.715607
1.24268	1.13861	0.928037	0.72584	0.762491
1.26137	1.15642	0.974971	0.750622	0.817333
1.27881	1.17275	1.01968	0.777979	0.874007
1.29294	1.18899	1.05894	0.808336	0.928031
1.30036	1.20598	1.09145	0.842969	0.977073
1.29646	1.22397	1.11754	0.883041	1.02038
1.27756	1.24268	1.13861	0.928037	1.05804
1.24359	1.26137	1.15642	0.974971	1.09045
1.19793	1.27881	1.17275	1.01968	1.11805
1.14505	1.29294	1.18899	1.05894	1.14121
1.08875	1.30036	1.20598	1.09145	1.16026
1.03162	1.29646	1.22397	1.11754	1.17565
0.975157	1.27756	1.24268	1.13861	1.18805
0.920054	1.24359	1.26137	1.15642	1.19856
0.866547	1.19793	1.27881	1.17275	1.20881
0.814658	1.14505	1.29294	1.18899	1.22083
0.764392	1.08875	1.30036	1.20598	1.23622
0.715828	1.03162	1.29646	1.22397	1.25466
0.669151	0.975157	1.27756	1.24268	1.27256
0.624642	0.920054	1.24359	1.26137	1.28347
0.582708	0.866547	1.19793	1.27881	1.28117
0.543951	0.814658	1.14505	1.29294	1.26297
0.509305	0.764392	1.08875	1.30036	1.23012
0.480163	0.715828	1.03162	1.29646	1.18607
0.458506	0.669151	0.975157	1.27756	1.13466
0.447051	0.624642	0.920054	1.24359	1.07919
0.449216	0.582708	0.866547	1.19793	1.02225
0.468502	0.543951	0.814658	1.14505	0.965705
0.50693	0.509305	0.764392	1.08875	0.910826
0.563099	0.480163	0.715828	1.03162	0.858398
0.631571	0.458506	0.669151	0.975157	0.80876
0.704609	0.447051	0.624642	0.920054	0.761825
0.774921	0.449216	0.582708	0.866547	0.717139
0.837384	0.468502	0.543951	0.814658	0.674096
0.889288	0.50693	0.509305	0.764392	0.632334
0.929766	0.563099	0.480163	0.715828	0.592115
0.959106	0.631571	0.458506	0.669151	0.554373
0.978241	0.704609	0.447051	0.624642	0.520499
0.988442	0.774921	0.449216	0.582708	0.49219
0.9912	0.837384	0.468502	0.543951	0.471559
0.988202	0.889288	0.50693	0.509305	0.461363
0.981392	0.929766	0.563099	0.480163	0.465056
0.973058	0.959106	0.631571	0.458506	0.486154
0.965928	0.978241	0.704609	0.447051	0.526508
0.96313	0.988442	0.774921	0.449216	0.584177
0.967849	0.9912	0.837384	0.468502	0.653034
0.982576	0.988202	0.889288	0.50693	0.72511
1.00807	0.981392	0.929766	0.563099	0.793575
1.04232	0.973058	0.959106	0.631571	0.854093
1.07994	0.965928	0.978241	0.704609	0.904565
1.11344	0.96313	0.988442	0.774921	0.944343
1.13675	0.967849	0.9912	0.837384	0.973608
1.14792	0.982576	0.988202	0.889288	0.993058
1.14873	1.00807	0.981392	0.929766	1.00378
1.1427	1.04232	0.973058	0.959106	1.00718
1.13349	1.07994	0.965928	0.978241	1.00493
1.12411	1.11344	0.96313	0.988442	0.998998
1.11675	1.13675	0.967849	0.9912	0.991701
1.11262	1.14792	0.982576	0.988202	0.985798
1.1119	1.14873	1.00807	0.981392	0.984446
1.11379	1.1427	1.04232	0.973058	0.990808
1.11647	1.13349	1.07994	0.965928	1.00719
1.11724	1.12411	1.11344	0.96313	1.0339
1.11262	1.11675	1.13675	0.967849	1.06819
1.09882	1.11262	1.14792	0.982576	1.10396
1.07317	1.1119	1.14873	1.00807	1.13363
1.03614	1.11379	1.1427	1.04232	1.15172
0.99148	1.11647	1.13349	1.07994	1.15703
0.944132	1.11724	1.12411	1.11344	1.15189
0.89822	1.11262	1.11675	1.13675	1.14007
0.85646	1.09882	1.11262	1.14792	1.1253
0.820303	1.07317	1.1119	1.14873	1.11063
0.790173	1.03614	1.11379	1.1427	1.09822
0.765655	0.99148	1.11647	1.13349	1.08926
0.745706	0.944132	1.11724	1.12411	1.0839
0.728942	0.89822	1.11262	1.11675	1.08127
0.713997	0.85646	1.09882	1.11262	1.07938
0.699884	0.820303	1.07317	1.1119	1.0753
0.686282	0.790173	1.03614	1.11379	1.06539
0.673736	0.765655	0.99148	1.11647	1.04614
0.663819	0.745706	0.944132	1.11724	1.01587
0.659294	0.728942	0.89822	1.11262	0.976161
0.664047	0.713997	0.85646	1.09882	0.931157
0.682135	0.699884	0.820303	1.07317	0.885473
0.715607	0.686282	0.790173	1.03614	0.84276
0.762491	0.673736	0.765655	0.99148	0.805441
0.817333	0.663819	0.745706	0.944132	0.774867
0.874007	0.659294	0.728942	0.89822	0.751452
0.928031	0.664047	0.713997	0.85646	0.734766
0.977073	0.682135	0.699884	0.820303	0.723687
1.02038	0.715607	0.686282	0.790173	0.71668
1.05804	0.762491	0.673736	0.765655	0.712184
1.09045	0.817333	0.663819	0.745706	0.709037
1.11805	0.874007	0.659294	0.728942	0.706852
1.14121	0.928031	0.664047	0.713997	0.706319
1.16026	0.977073	0.682135	0.699884	0.709413
1.17565	1.02038	0.715607	0.686282	0.719377
1.18805	1.05804	0.762491	0.673736	0.739996
1.19856	1.09045	0.817333	0.663819	0.773622
1.20881	1.11805	0.874007	0.659294	0.818941
1.22083	1.14121	0.928031	0.664047	0.871013
1.23622	1.16026	0.977073	0.682135	0.923972
1.25466	1.17565	1.02038	0.715607	0.973541
1.27256	1.18805	1.05804	0.762491	1.0177
1.28347	1.19856	1.09045	0.817333	1.05611
1.28117	1.20881	1.11805	0.874007	1.08932
1.26297	1.22083	1.14121	0.928031	1.11817
1.23012	1.23622	1.16026	0.977073	1.14345
1.18607	1.25466	1.17565	1.02038	1.16579
1.13466	1.27256	1.18805	1.05804	1.18559
1.07919	1.28347	1.19856	1.09045	1.20324
1.02225	1.28117	1.20881	1.11805	1.21914
0.965705	1.26297	1.22083	1.14121	1.23392
0.910826	1.23012	1.23622	1.16026	1.24851
0.858398	1.18607	1.25466	1.17565	1.26393
0.80876	1.13466	1.27256	1.18805	1.28039
0.761825	1.07919	1.28347	1.19856	1.29579
0.717139	1.02225	1.28117	1.20881	1.30496
0.674096	0.965705	1.26297	1.22083	1.30176
0.632334	0.910826	1.23012	1.23622	1.28287
0.592115	0.858398	1.18607	1.25466	1.24917
0.554373	0.80876	1.13466	1.27256	1.20402
0.520499	0.761825	1.07919	1.28347	1.15129
0.49219	0.717139	1.02225	1.28117	1.0942
0.471559	0.674096	0.965705	1.26297	1.03522
0.461363	0.632334	0.910826	1.23012	0.976069
0.465056	0.592115	0.858398	1.18607	0.917966
0.486154	0.554373	0.80876	1.13466	0.861721
0.526508	0.520499	0.761825	1.07919	0.807832
0.584177	0.49219	0.717139	1.02225	0.756534
0.653034	0.471559	0.674096	0.965705	0.70783
0.72511	0.461363	0.632334	0.910826	0.661564
0.793575	0.465056	0.592115	0.858398	0.617584
0.854093	0.486154	0.554373	0.80876	0.576005
0.904565	0.526508	0.520499	0.761825	0.537402
0.944343	0.584177	0.49219	0.717139	0.502807
0.973608	0.653034	0.471559	0.674096	0.473635
0.993058	0.72511	0.461363	0.632334	0.451755
1.00378	0.793575	0.465056	0.592115	0.439721
1.00718	0.854093	0.486154	0.554373	0.440916
1.00493	0.904565	0.526508	0.520499	0.459142
0.998998	0.944343	0.584177	0.49219	0.497082
0.991701	0.973608	0.653034	0.471559	0.553858
0.985798	0.993058	0.72511	0.461363	0.623767
0.984446	1.00378	0.793575	0.465056	0.698207
0.990808	1.00718	0.854093	0.486154	0.769242
1.00719	1.00493	0.904565	0.526508	0.831695
1.0339	0.998998	0.944343	0.584177	0.883143
1.06819	0.991701	0.973608	0.653034	0.923023
1.10396	0.985798	0.993058	0.72511	0.951787
1.13363	0.984446	1.00378	0.793575	0.970401
1.15172	0.990808	1.00718	0.854093	0.980132
1.15703	1.00719	1.00493	0.904565	0.982458
1.15189	1.0339	0.998998	0.944343	0.979058
1.14007	1.06819	0.991701	0.973608	0.971838
1.1253	1.10396	0.985798	0.993058	0.963023
1.11063	1.13363	0.984446	1.00378	0.955273
1.09822	1.15172	0.990808	1.00718	0.951717
1.08926	1.15703	1.00719	1.00493	0.955669
1.0839	1.15189	1.0339	0.998998	0.969853
1.08127	1.14007	1.06819	0.991701	0.995228
1.07938	1.1253	1.10396	0.985798	1.02985
1.0753	1.11063	1.13363	0.984446	1.06835
1.06539	1.09822	1.15172	0.990808	1.10333
1.04614	1.08926	1.15703	1.00719	1.12877
1.01587	1.0839	1.15189	1.0339	1.14261
0.976161	1.08127	1.14007	1.06819	1.14638
0.931157	1.07938	1.1253	1.10396	1.1434
0.885473	1.0753	1.11063	1.13363	1.13719
0.84276	1.06539	1.09822	1.15172	1.13072
0.805441	1.04614	1.08926	1.15703	1.12611
0.774867	1.01587	1.0839	1.15189	1.12455
0.751452	0.976161	1.08127	1.14007	1.12624
0.734766	0.931157	1.07938	1.1253	1.13041
0.723687	0.885473	1.0753	1.11063	1.13537
0.71668	0.84276	1.06539	1.09822	1.13854
0.712184	0.805441	1.04614	1.08926	1.13651
0.709037	0.774867	1.01587	1.0839	1.12533
0.706852	0.751452	0.976161	1.08127	1.10193
0.706319	0.734766	0.931157	1.07938	1.0663
0.709413	0.723687	0.885473	1.0753	1.022
0.719377	0.71668	0.84276	1.06539	0.974039
0.739996	0.712184	0.805441	1.04614	0.92672
0.773622	0.709037	0.774867	1.01587	0.882877
0.818941	0.706852	0.751452	0.976161	0.844015
0.871013	0.706319	0.734766	0.931157	0.810575
0.923972	0.709413	0.723687	0.885473	0.782168
0.973541	0.719377	0.71668	0.84276	0.757817
1.0177	0.739996	0.712184	0.805441	0.736248
1.05611	0.773622	0.709037	0.774867	0.716228
1.08932	0.818941	0.706852	0.751452	0.696888
1.11817	0.871013	0.706319	0.734766	0.677964
1.14345	0.923972	0.709413	0.723687	0.659946
1.16579	0.973541	0.719377	0.71668	0.644216
1.18559	1.0177	0.739996	0.712184	0.633225
1.20324	1.05611	0.773622	0.709037	0.630588
1.21914	1.08932	0.818941	0.706852	0.640554
1.23392	1.11817	0.871013	0.706319	0.666314
1.24851	1.14345	0.923972	0.709413	0.707719
1.26393	1.16579	0.973541	0.719377	0.760586
1.28039	1.18559	1.0177	0.739996	0.818694
1.29579	1.20324	1.05611	0.773622	0.876522
1.30496	1.21914	1.08932	0.818941	0.930554
1.30176	1.23392	1.11817	0.871013	0.979115
1.28287	1.24851	1.14345	0.923972	1.02169
1.24917	1.26393	1.16579	0.973541	1.05833
1.20402	1.28039	1.18559	1.0177	1.08925
1.15129	1.29579	1.20324	1.05611	1.11474
1.0942	1.30496	1.21914	1.08932	1.1351
1.03522	1.30176	1.23392	1.11817	1.15075
0.976069	1.28287	1.24851	1.14345	1.16236
0.917966	1.24917	1.26393	1.16579	1.17103
0.861721	1.20402	1.28039	1.18559	1.17843
0.807832	1.15129	1.29579	1.20324	1.1868
0.756534	1.0942	1.30496	1.21914	1.19852
0.70783	1.03522	1.30176	1.23392	1.21505
0.661564	0.976069	1.28287	1.24851	1.23537
0.617584	0.917966	1.24917	1.26393	1.25506
0.576005	0.861721	1.20402	1.28039	1.26723
0.537402	0.807832	1.15129	1.29579	1.26575
0.502807	0.756534	1.0942	1.30496	1.24827
0.473635	0.70783	1.03522	1.30176	1.21631
0.451755	0.661564	0.976069	1.28287	1.17347
0.439721	0.617584	0.917966	1.24917	1.12366
0.440916	0.576005	0.861721	1.20402	1.07027
0.459142	0.537402	0.807832	1.15129	1.01589
0.497082	0.502807	0.756534	1.0942	0.962397
0.553858	0.473635	0.70783	1.03522	0.911021
0.623767	0.451755	0.661564	0.976069	0.86243
0.698207	0.439721	0.617584	0.917966	0.816742
0.769242	0.440916	0.576005	0.861721	0.77354
0.831695	0.459142	0.537402	0.807832	0.731984
0.883143	0.497082	0.502807	0.756534	0.691184
0.923023	0.553858	0.473635	0.70783	0.650748
0.951787	0.623767	0.451755	0.661564	0.611151
0.970401	0.698207	0.439721	0.617584	0.573643
0.980132	0.769242	0.440916	0.576005	0.539902
0.982458	0.831695	0.459142	0.537402	0.51185
0.979058	0.883143	0.497082	0.502807	0.491767
0.971838	0.923023	0.553858	0.473635	0.482496
0.963023	0.951787	0.623767	0.451755	0.487392
0.955273	0.970401	0.698207	0.439721	0.509547
0.951717	0.980132	0.769242	0.440916	0.550127
0.955669	0.982458	0.831695	0.459142	0.606699
0.969853	0.979058	0.883143	0.497082	0.673365
0.995228	0.971838	0.923023	0.553858	0.742992
1.02985	0.963023	0.951787	0.623767	0.809597
1.06835	0.955273	0.970401	0.698207	0.869289
1.10333	0.951717	0.980132	0.769242	0.919988
1.12877	0.955669	0.982458	0.831695	0.960795
1.14261	0.969853	0.979058	0.883143	0.991553
1.14638	0.995228	0.971838	0.923023	1.01267
1.1434	1.02985	0.963023	0.951787	1.02506
1.13719	1.06835	0.955273	0.970401	1.03006
1.13072	1.10333	0.951717	0.980132	1.02933
1.12611	1.12877	0.955669	0.982458	1.0249
1.12455	1.14261	0.969853	0.979058	1.01913
1.12624	1.14638	0.995228	0.971838	1.01484
1.13041	1.1434	1.02985	0.963023	1.01513
1.13537	1.13719	1.06835	0.955273	1.02297
1.13854	1.13072	1.10333	0.951717	1.04031
1.13651	1.12611	1.12877	0.955669	1.06706
1.12533	1.12455	1.14261	0.969853	1.10003
1.10193	1.12624	1.14638	0.995228	1.13281
1.0663	1.13041	1.1434	1.02985	1.15775
1.022	1.13537	1.13719	1.06835	1.16965
0.974039	1.13854	1.13072	1.10333	1.16782
0.92672	1.13651	1.12611	1.12877	1.15504
0.882877	1.12533	1.12455	1.14261	1.13544
0.844015	1.10193	1.12624	1.14638	1.11292
0.810575	1.0663	1.13041	1.1434	1.09063
0.782168	1.022	1.13537	1.13719	1.07073
0.757817	0.974039	1.13854	1.13072	1.05444
0.736248	0.92672	1.13651	1.12611	1.04192
0.716228	0.882877	1.12533	1.12455	1.03224
0.696888	0.844015	1.10193	1.12624	1.02337
0.677964	0.810575	1.0663	1.13041	1.01232
0.659946	0.782168	1.022	1.13537	0.995675
0.644216	0.757817	0.974039	1.13854	0.970623
0.633225	0.736248	0.92672	1.13651	0.936501
0.630588	0.716228	0.882877	1.12533	0.895508
0.640554	0.696888	0.844015	1.10193	0.851657
0.666314	0.677964	0.810575	1.0663	0.809043
0.707719	0.659946	0.782168	1.022	0.770924
0.760586	0.644216	0.757817	0.974039	0.739622
0.818694	0.633225	0.736248	0.92672	0.716613
0.876522	0.630588	0.716228	0.882877	0.702522
0.930554	0.640554	0.696888	0.844015	0.697063
0.979115	0.666314	0.677964	0.810575	0.699099
1.02169	0.707719	0.659946	0.782168	0.706925
1.05833	0.760586	0.644216	0.757817	0.718729
1.08925	0.818694	0.633225	0.736248	0.733109
1.11474	0.876522	0.630588	0.716228	0.749532
1.1351	0.930554	0.640554	0.696888	0.768647
1.15075	0.979115	0.666314	0.677964	0.792305
1.16236	1.02169	0.707719	0.659946	0.822944
1.17103	1.05833	0.760586	0.644216	0.861978
1.17843	1.08925	0.818694	0.633225	0.907939
1.1868	1.11474	0.876522	0.630588	0.95653
1.19852	1.1351	0.930554	0.640554	1.00297
1.21505	1.15075	0.979115	0.666314	1.04412
1.23537	1.16236	1.02169	0.707719	1.07895
1.25506	1.17103	1.05833	0.760586	1.10796
1.26723	1.17843	1.08925	0.818694	1.13243
1.26575	1.1868	1.11474	0.876522	1.15384
1.24827	1.19852	1.1351	0.930554	1.17348
1.21631	1.21505	1.15075	0.979115	1.19229
1.17347	1.23537	1.16236	1.02169	1.21077
1.12366	1.25506	1.17103	1.05833	1.22909
1.07027	1.26723	1.17843	1.08925	1.24722
1.01589	1.26575	1.1868	1.11474	1.265
0.962397	1.24827	1.19852	1.1351	1.28202
0.911021	1.21631	1.21505	1.15075	1.29711
0.86243	1.17347	1.23537	1.16236	1.30744
0.816742	1.12366	1.25506	1.17103	1.30818
0.77354	1.07027	1.26723	1.17843	1.29462
0.731984	1.01589	1.26575	1.1868	1.26545
0.691184	0.962397	1.24827	1.19852	1.22327
0.650748	0.911021	1.21631	1.21505	1.17229
0.611151	0.86243	1.17347	1.23537	1.11641
0.573643	0.816742	1.12366	1.25506	1.0584
0.539902	0.77354	1.07027	1.26723	1.00006
0.51185	0.731984	1.01589	1.26575	0.942413
0.491767	0.691184	0.962397	1.24827	0.886077
0.482496	0.650748	0.911021	1.21631	0.831412
0.487392	0.611151	0.86243	1.17347	0.778674
0.509547	0.573643	0.816742	1.12366	0.728057
0.550127	0.539902	0.77354	1.07027	0.679722
0.606699	0.51185	0.731984	1.01589	0.633817
0.673365	0.491767	0.691184	0.962397	0.590547
0.742992	0.482496	0.650748	0.911021	0.550304
0.809597	0.487392	0.611151	0.86243	0.513816
0.869289	0.509547	0.573643	0.816742	0.482241
0.919988	0.550127	0.539902	0.77354	0.457237
0.960795	0.606699	0.51185	0.731984	0.441108
0.991553	0.673365	0.491767	0.691184	0.436935
1.01267	0.742992	0.482496	0.650748	0.448374
1.02506	0.809597	0.487392	0.611151	0.478584
1.03006	0.869289	0.509547	0.573643	0.528182
1.02933	0.919988	0.550127	0.539902	0.593444
1.0249	0.960795	0.606699	0.51185	0.666861
1.01913	0.991553	0.673365	0.491767	0.740071
1.01484	1.01267	0.742992	0.482496	0.806619
1.01513	1.02506	0.809597	0.487392	0.862861
1.02297	1.03006	0.869289	0.509547	0.90745
1.04031	1.02933	0.919988	0.550127	0.940477
1.06706	1.0249	0.960795	0.606699	0.962798
1.10003	1.01913	0.991553	0.673365	0.975646
1.13281	1.01484	1.01267	0.742992	0.980468
1.15775	1.01513	1.02506	0.809597	0.978884
1.16965	1.02297	1.03006	0.869289	0.97272
1.16782	1.04031	1.02933	0.919988	0.964084
1.15504	1.06706	1.0249	0.960795	0.955478
1.13544	1.10003	1.01913	0.991553	0.949861
1.11292	1.13281	1.01484	1.01267	0.950499
1.09063	1.15775	1.01513	1.02506	0.960404
1.07073	1.16965	1.02297	1.03006	0.981348
1.05444	1.16782	1.04031	1.02933	1.01271
1.04192	1.15504	1.06706	1.0249	1.05058
1.03224	1.13544	1.10003	1.01913	1.08809
1.02337	1.11292	1.13281	1.01484	1.11819
1.01232	1.09063	1.15775	1.01513	1.13706
0.995675	1.07073	1.16965	1.02297	1.14498
0.970623	1.05444	1.16782	1.04031	1.14481
0.936501	1.04192	1.15504	1.06706	1.1401
0.895508	1.03224	1.13544	1.10003	1.13408
0.851657	1.02337	1.11292	1.13281	1.12921
0.809043	1.01232	1.09063	1.15775	1.12704
0.770924	0.995675	1.07073	1.16965	1.12813
0.739622	0.970623	1.05444	1.16782	1.13205
0.716613	0.936501	1.04192	1.15504	1.13746
0.702522	0.895508	1.03224	1.13544	1.14215
0.697063	0.851657	1.02337	1.11292	1.14307
0.699099	0.809043	1.01232	1.09063	1.13645
0.706925	0.770924	0.995675	1.07073	1.11859
0.718729	0.739622	0.970623	1.05444	1.08795
0.733109	0.716613	0.936501	1.04192	1.04667
0.749532	0.702522	0.895508	1.03224	0.999539
0.768647	0.697063	0.851657	1.02337	0.951337
0.792305	0.699099	0.809043	1.01232	0.90553
0.822944	0.706925	0.770924	0.995675	0.864129
0.861978	0.718729	0.739622	0.970623	0.827962
0.907939	0.733109	0.716613	0.936501	0.796933
0.95653	0.749532	0.702522	0.895508	0.770263
1.00297	0.768647	0.697063	0.851657	0.746769
1.04412	0.792305	0.699099	0.809043	0.725191
1.07895	0.822944	0.706925	0.770924	0.704524
1.10796	0.861978	0.718729	0.739622	0.684282
1.13243	0.907939	0.733109	0.716613	0.664662
1.15384	0.95653	0.749532	0.702522	0.646657
1.17348	1.00297	0.768647	0.697063	0.632208
1.19229	1.04412	0.792305	0.699099	0.624392
1.21077	1.07895	0.822944	0.706925	0.627283
1.22909	1.10796	0.861978	0.718729	0.644861
1.24722	1.13243	0.907939	0.733109	0.678832
1.265	1.15384	0.95653	0.749532	0.726889
1.28202	1.17348	1.00297	0.768647	0.783451
1.29711	1.19229	1.04412	0.792305	0.842373
1.30744	1.21077	1.07895	0.822944	0.899073
1.30818	1.22909	1.10796	0.861978	0.950987
1.29462	1.24722	1.13243	0.907939	0.997049
1.26545	1.265	1.15384	0.95653	1.03702
1.22327	1.28202	1.17348	1.00297	1.07102
1.17229	1.29711	1.19229	1.04412	1.09927
1.11641	1.30744	1.21077	1.07895	1.12203
1.0584	1.30818	1.22909	1.10796	1.13966
1.00006	1.29462	1.24722	1.13243	1.15273
0.942413	1.26545	1.265	1.15384	1.16214
0.886077	1.22327	1.28202	1.17348	1.16933
0.831412	1.17229	1.29711	1.19229	1.17632
0.778674	1.11641	1.30744	1.21077	1.18561
0.728057	1.0584	1.30818	1.22909	1.19935
0.679722	1.00006	1.29462	1.24722	1.21809
0.633817	0.942413	1.26545	1.265	1.23933
0.590547	0.886077	1.22327	1.28202	1.25728
0.550304	0.831412	1.17229	1.29711	1.26484
0.513816	0.778674	1.11641	1.30744	1.25725
0.482241	0.728057	1.0584	1.30818	1.23389
0.457237	0.679722	1.00006	1.29462	1.19741
0.441108	0.633817	0.942413	1.26545	1.15173
0.436935	0.590547	0.886077	1.22327	1.10063
0.448374	0.550304	0.831412	1.17229	1.04719
0.478584	0.513816	0.778674	1.11641	0.993725
0.528182	0.482241	0.728057	1.0584	0.941821
0.593444	0.457237	0.679722	1.00006	0.892458
0.666861	0.441108	0.633817	0.942413	0.846038
0.740071	0.436935	0.590547	0.886077	0.802392
0.806619	0.448374	0.550304	0.831412	0.760815
0.862861	0.478584	0.513816	0.778674	0.720302
0.90745	0.528182	0.482241	0.728057	0.680059
0.940477	0.593444	0.457237	0.679722	0.640046
0.962798	0.666861	0.441108	0.633817	0.601153
0.975646	0.740071	0.436935	0.590547	0.564915
0.980468	0.806619	0.448374	0.550304	0.533174
0.978884	0.862861	0.478584	0.513816	0.508017
0.97272	0.90745	0.528182	0.482241	0.491955
0.964084	0.940477	0.593444	0.457237	0.488063
0.955478	0.962798	0.666861	0.441108	0.499668
0.949861	0.975646	0.740071	0.436935	0.529194
0.950499	0.980468	0.806619	0.448374	0.576376
0.960404	0.978884	0.862861	0.478584	0.637237
0.981348	0.97272	0.90745	0.528182	0.705223
1.01271	0.964084	0.940477	0.593444	0.773666
1.05058	0.955478	0.962798	0.666861	0.837545
1.08809	0.949861	0.975646	0.740071	0.893809
1.11819	0.950499	0.980468	0.806619	0.940876
1.13706	0.960404	0.978884	0.862861	0.978091
1.14498	0.981348	0.97272	0.90745	1.00544
1.14481	1.01271	0.964084	0.940477	1.02347
1.1401	1.05058	0.955478	0.962798	1.03324
1.13408	1.08809	0.949861	0.975646	1.0362
1.12921	1.11819	0.950499	0.980468	1.03417
1.12704	1.13706	0.960404	0.978884	1.02931
1.12813	1.14498	0.981348	0.97272	1.02418
1.13205	1.14481	1.01271	0.964084	1.02172
1.13746	1.1401	1.05058	0.955478	1.02504
1.14215	1.13408	1.08809	0.949861	1.03675
1.14307	1.12921	1.11819	0.950499	1.05805
1.13645	1.12704	1.13706	0.960404	1.08762
1.11859	1.12813	1.14498	0.981348	1.12086
1.08795	1.13205	1.14481	1.01271	1.15046
1.04667	1.13746	1.1401	1.05058	1.16932
0.999539	1.14215	1.13408	1.08809	1.17405
0.951337	1.14307	1.12921	1.11819	1.16567
0.90553	1.13645	1.12704	1.13706	1.14783
0.864129	1.11859	1.12813	1.14498	1.12475
0.827962	1.08795	1.13205	1.14481	1.10011
0.796933	1.04667	1.13746	1.1401	1.07667
0.770263	0.999539	1.14215	1.13408	1.05625
0.746769	0.951337	1.14307	1.12921	1.03963
0.725191	0.90553	1.13645	1.12704	1.02657
0.704524	0.864129	1.11859	1.12813	1.01571
0.684282	0.827962	1.08795	1.13205	1.00459
0.664662	0.796933	1.04667	1.13746	0.99004
0.646657	0.770263	0.999539	1.14215	0.968835
0.632208	0.746769	0.951337	1.14307	0.93906
0.624392	0.725191	0.90553	1.13645	0.901353
0.627283	0.704524	0.864129	1.11859	0.858836
0.644861	0.684282	0.827962	1.08795	0.815616
0.678832	0.664662	0.796933	1.04667	0.775392
0.726889	0.646657	0.770263	0.999539	0.740996
0.783451	0.632208	0.746769	0.951337	0.714438
0.842373	0.624392	0.725191	0.90553	0.696937
0.899073	0.627283	0.704524	0.864129	0.688836
0.950987	0.644861	0.684282	0.827962	0.68953
0.997049	0.678832	0.664662	0.796933	0.697592
1.03702	0.726889	0.646657	0.770263	0.711153
1.07102	0.783451	0.632208	0.746769	0.728431
1.09927	0.842373	0.624392	0.725191	0.748253
1.12203	0.899073	0.627283	0.704524	0.770457
1.13966	0.950987	0.644861	0.684282	0.796065
1.15273	0.997049	0.678832	0.664662	0.82698
1.16214	1.03702	0.726889	0.646657	0.86485
1.16933	1.07102	0.783451	0.632208	0.909251
1.17632	1.09927	0.842373	0.624392	0.956891
1.18561	1.12203	0.899073	0.627283	1.00317
1.19935	1.13966	0.950987	0.644861	1.04453
1.21809	1.15273	0.997049	0.678832	1.07946
1.23933	1.16214	1.03702	0.726889	1.10816
1.25728	1.16933	1.07102	0.783451	1.13186
1.26484	1.17632	1.09927	0.842373	1.15217
1.25725	1.18561	1.12203	0.899073	1.17065
1.23389	1.19935	1.13966	0.950987	1.18849
1.19741	1.21809	1.15273	0.997049	1.2064
1.15173	1.23933	1.16214	1.03702	1.22464
1.10063	1.25728	1.16933	1.07102	1.24309
1.04719	1.26484	1.17632	1.09927	1.26136
0.993725	1.25725	1.18561	1.12203	1.27879
0.941821	1.23389	1.19935	1.13966	1.29401
0.892458	1.19741	1.21809	1.15273	1.30425
0.846038	1.15173	1.23933	1.16214	1.30497
0.802392	1.10063	1.25728	1.16933	1.29159
0.760815	1.04719	1.26484	1.17632	1.26263
0.720302	0.993725	1.25725	1.18561	1.22056
0.680059	0.941821	1.23389	1.19935	1.16967
0.640046	0.892458	1.19741	1.21809	1.11397
0.601153	0.846038	1.15173	1.23933	1.05636
0.564915	0.802392	1.10063	1.25728	0.998645
0.533174	0.760815	1.04719	1.26484	0.941805
0.508017	0.720302	0.993725	1.25725	0.886335
0.491955	0.680059	0.941821	1.23389	0.832481
0.488063	0.640046	0.892458	1.19741	0.780402
0.499668	0.601153	0.846038	1.15173	0.730253
0.529194	0.564915	0.802392	1.10063	0.682204
0.576376	0.533174	0.760815	1.04719	0.636455
0.637237	0.508017	0.720302	0.993725	0.593277
0.705223	0.491955	0.680059	0.941821	0.553104
0.773666	0.488063	0.640046	0.892458	0.51668
0.837545	0.499668	0.601153	0.846038	0.485171
0.893809	0.529194	0.564915	0.802392	0.460271
0.940876	0.576376	0.533174	0.760815	0.44433
0.978091	0.637237	0.508017	0.720302	0.440474
1.00544	0.705223	0.491955	0.680059	0.452333
1.02347	0.773666	0.488063	0.640046	0.482925
1.03324	0.837545	0.499668	0.601153	0.532646
1.0362	0.893809	0.529194	0.564915	0.597674
1.03417	0.940876	0.576376	0.533174	0.670639
1.02931	0.978091	0.637237	0.508017	0.743424
1.02418	1.00544	0.705223	0.491955	0.809725
1.02172	1.02347	0.773666	0.488063	0.865909
1.02504	1.03324	0.837545	0.499668	0.910573
1.03675	1.0362	0.893809	0.529194	0.943747
1.05805	1.03417	0.940876	0.576376	0.966246
1.08762	1.02931	0.978091	0.637237	0.979284
1.12086	1.02418	1.00544	0.705223	0.984297
1.15046	1.02172	1.02347	0.773666	0.982902
1.16932	1.02504	1.03324	0.837545	0.976931
1.17405	1.03675	1.0362	0.893809	0.968505
1.16567	1.05805	1.03417	0.940876	0.96015
1.14783	1.08762	1.02931	0.978091	0.954839
1.12475	1.12086	1.02418	1.00544	0.955824
1.10011	1.15046	1.02172	1.02347	0.966055
1.07667	1.16932	1.02504	1.03324	0.987217
1.05625	1.17405	1.03675	1.0362	1.0186
1.03963	1.16567	1.05805	1.03417	1.05622
1.02657	1.14783	1.08762	1.02931	1.09317
1.01571	1.12475	1.12086	1.02418	1.12237
1.00459	1.10011	1.15046	1.02172	1.14007
0.99004	1.07667	1.16932	1.02504	1.14669
0.968835	1.05625	1.17405	1.03675	1.14515
0.93906	1.03963	1.16567	1.05805	1.13908
0.901353	1.02657	1.14783	1.08762	1.13175
0.858836	1.01571	1.12475	1.12086	1.12563
0.815616	1.00459	1.10011	1.15046	1.12228
0.775392	0.99004	1.07667	1.16932	1.12227
0.740996	0.968835	1.05625	1.17405	1.12517
0.714438	0.93906	1.03963	1.16567	1.12959
0.696937	0.901353	1.02657	1.14783	1.13326
0.688836	0.858836	1.01571	1.12475	1.13307
0.68953	0.815616	1.00459	1.10011	1.12522
0.697592	0.775392	0.99004	1.07667	1.10617
0.711153	0.740996	0.968835	1.05625	1.07459
0.728431	0.714438	0.93906	1.03963	1.03286
0.748253	0.696937	0.901353	1.02657	0.985771
0.770457	0.688836	0.858836	1.01571	0.938035
0.796065	0.68953	0.815616	1.00459	0.893033
0.82698	0.697592	0.775392	0.99004	0.852729
0.86485	0.711153	0.740996	0.968835	0.81793
0.909251	0.728431	0.714438	0.93906	0.788525
0.956891	0.748253	0.696937	0.901353	0.763711
1.00317	0.770457	0.688836	0.858836	0.742261
1.04453	0.796065	0.68953	0.815616	0.722856
1.07946	0.82698	0.697592	0.775392	0.704429
1.10816	0.86485	0.711153	0.740996	0.686453
1.13186	0.909251	0.728431	0.714438	0.669125
1.15217	0.956891	0.748253	0.696937	0.653502
1.17065	1.00317	0.770457	0.688836	0.64166
1.18849	1.04453	0.796065	0.68953	0.636846
1.2064	1.07946	0.82698	0.697592	0.643229
1.22464	1.10816	0.86485	0.711153	0.664555
1.24309	1.13186	0.909251	0.728431	0.701833
1.26136	1.15217	0.956891	0.748253	0.751926
1.27879	1.17065	1.00317	0.770457	0.808879
1.29401	1.18849	1.04453	0.796065	0.866781
1.30425	1.2064	1.07946	0.82698	0.921571
1.30497	1.22464	1.10816	0.86485	0.971187
1.29159	1.24309	1.13186	0.909251	1.01493
1.26263	1.26136	1.15217	0.956891	1.05279
1.22056	1.27879	1.17065	1.00317	1.08503
1.16967	1.29401	1.18849	1.04453	1.11193
1.11397	1.30425	1.2064	1.07946	1.1338
1.05636	1.30497	1.22464	1.10816	1.151
0.998645	1.29159	1.24309	1.13186	1.1641
0.941805	1.26263	1.26136	1.15217	1.17402
0.886335	1.22056	1.27879	1.17065	1.18219
0.832481	1.16967	1.29401	1.18849	1.19065
0.780402	1.11397	1.30425	1.2064	1.20173
0.730253	1.05636	1.30497	1.22464	1.21719
0.682204	0.998645	1.29159	1.24309	1.23665
0.636455	0.941805	1.26263	1.26136	1.25643
0.593277	0.886335	1.22056	1.27879	1.26997
0.553104	0.832481	1.16967	1.29401	1.27077
0.51668	0.780402	1.11397	1.30425	1.25567
0.485171	0.730253	1.05636	1.30497	1.22562
0.460271	0.682204	0.998645	1.29159	1.18396
0.44433	0.636455	0.941805	1.26263	1.1346
0.440474	0.593277	0.886335	1.22056	1.08105
0.452333	0.553104	0.832481	1.16967	1.02602
0.482925	0.51668	0.780402	1.11397	0.971494
0.532646	0.485171	0.730253	1.05636	0.918821
0.597674	0.460271	0.682204	0.998645	0.868783
0.670639	0.44433	0.636455	0.941805	0.821642
0.743424	0.440474	0.593277	0.886335	0.777146
0.809725	0.452333	0.553104	0.832481	0.734601
0.865909	0.482925	0.51668	0.780402	0.693161
0.910573	0.532646	0.485171	0.730253	0.652331
0.943747	0.597674	0.460271	0.682204	0.612387
0.966246	0.670639	0.44433	0.636455	0.5744
0.979284	0.743424	0.440474	0.593277	0.539925
0.984297	0.809725	0.452333	0.553104	0.510787
0.982902	0.865909	0.482925	0.51668	0.489152
0.976931	0.910573	0.532646	0.485171	0.477746
0.968505	0.943747	0.597674	0.460271	0.479895
0.96015	0.966246	0.670639	0.44433	0.498929
0.954839	0.979284	0.743424	0.440474	0.536618
0.955824	0.984297	0.809725	0.452333	0.591278
0.966055	0.982902	0.865909	0.482925	0.657398
0.987217	0.976931	0.910573	0.532646	0.727654
1.0186	0.968505	0.943747	0.597674	0.795556
1.05622	0.96015	0.966246	0.670639	0.856758
1.09317	0.954839	0.979284	0.743424	0.908921
1.12237	0.955824	0.984297	0.809725	0.951058
1.14007	0.966055	0.982902	0.865909	0.982999
1.14669	0.987217	0.976931	0.910573	1.00515
1.14515	1.0186	0.968505	0.943747	1.01839
1.13908	1.05622	0.96015	0.966246	1.02403
1.13175	1.09317	0.954839	0.979284	1.02368
1.12563	1.12237	0.955824	0.984297	1.01928
1.12228	1.14007	0.966055	0.982902	1.01316
1.12227	1.14669	0.987217	0.976931	1.00802
1.12517	1.14515	1.0186	0.968505	1.00696
1.12959	1.13908	1.05622	0.96015	1.01307
1.13326	1.13175	1.09317	0.954839	1.02861
1.13307	1.12563	1.12237	0.955824	1.05399
1.12522	1.12228	1.14007	0.966055	1.08664
1.10617	1.12227	1.14669	0.987217	1.12069
1.07459	1.12517	1.14515	1.0186	1.14846
1.03286	1.12959	1.13908	1.05622	1.16409
0.985771	1.13326	1.13175	1.09317	1.16606
0.938035	1.13307	1.12563	1.12237	1.15664
0.893033	1.12522	1.12228	1.14007	1.13977
0.852729	1.10617	1.12227	1.14669	1.11941
0.81793	1.07459	1.12517	1.14515	1.09882
0.788525	1.03286	1.12959	1.13908	1.08032
0.763711	0.985771	1.13326	1.13175	1.06528
0.742261	0.938035	1.13307	1.12563	1.05403
0.722856	0.893033	1.12522	1.12228	1.04582
0.704429	0.852729	1.10617	1.12227	1.0388
0.686453	0.81793	1.07459	1.12517	1.0301
0.669125	0.788525	1.03286	1.12959	1.01624
0.653502	0.763711	0.985771	1.13326	0.994057
0.64166	0.742261	0.938035	1.13307	0.962217
0.636846	0.722856	0.893033	1.12522	0.922357
0.643229	0.704429	0.852729	1.10617	0.878371
0.664555	0.686453	0.81793	1.07459	0.834564
0.701833	0.669125	0.788525	1.03286	0.794442
0.751926	0.653502	0.763711	0.985771	0.760492
0.808879	0.64166	0.742261	0.938035	0.734279
0.866781	0.636846	0.722856	0.893033	0.7165
0.921571	0.643229	0.704429	0.852729	0.706962
0.971187	0.664555	0.686453	0.81793	0.704642
1.01493	0.701833	0.669125	0.788525	0.707935
1.05279	0.751926	0.653502	0.763711	0.715074
1.08503	0.808879	0.64166	0.742261	0.724621
1.11193	0.866781	0.636846	0.722856	0.735929
1.1338	0.921571	0.643229	0.704429	0.749493
1.151	0.971187	0.664555	0.686453	0.767103
1.1641	1.01493	0.701833	0.669125	0.791519
1.17402	1.05279	0.751926	0.653502	0.825182
1.18219	1.08503	0.808879	0.64166	0.868088
1.19065	1.11193	0.866781	0.636846	0.916763
1.20173	1.1338	0.921571	0.643229	0.965991
1.21719	1.151	0.971187	0.664555	1.0115
1.23665	1.1641	1.01493	0.701833	1.05119
1.25643	1.17402	1.05279	0.751926	1.08482
1.26997	1.18219	1.08503	0.808879	1.11326
1.27077	1.19065	1.11193	0.866781	1.1378
1.25567	1.20173	1.1338	0.921571	1.15971
1.22562	1.21719	1.151	0.971187	1.17995
1.18396	1.23665	1.1641	1.01493	1.19917
1.1346	1.25643	1.17402	1.05279	1.21767
1.08105	1.26997	1.18219	1.08503	1.23562
1.02602	1.27077	1.19065	1.11193	1.25313
0.971494	1.25567	1.20173	1.1338	1.27026
0.918821	1.22562	1.21719	1.151	1.28676
0.868783	1.18396	1.23665	1.1641	1.30131
0.821642	1.1346	1.25643	1.17402	1.31039
0.777146	1.08105	1.26997	1.18219	1.30862
0.734601	1.02602	1.27077	1.19065	1.29176
0.693161	0.971494	1.25567	1.20173	1.25959
0.652331	0.918821	1.22562	1.21719	1.2153
0.612387	0.868783	1.18396	1.23665	1.16303
0.5744	0.821642	1.1346	1.25643	1.10636
0.539925	0.777146	1.08105	1.26997	1.04778
0.510787	0.734601	1.02602	1.27077	0.988943
0.489152	0.693161	0.971494	1.25567	0.930869
0.477746	0.652331	0.918821	1.22562	0.874211
0.479895	0.612387	0.868783	1.18396	0.819398
0.498929	0.5744	0.821642	1.1346	0.76672
0.536618	0.539925	0.777146	1.08105	0.716366
0.591278	0.510787	0.734601	1.02602	0.668447
0.657398	0.489152	0.693161	0.971494	0.623052
0.727654	0.477746	0.652331	0.918821	0.580355
0.795556	0.479895	0.612387	0.868783	0.540785
0.856758	0.498929	0.5744	0.821642	0.505158
0.908921	0.536618	0.539925	0.777146	0.474727
0.951058	0.591278	0.510787	0.734601	0.45124
0.982999	0.657398	0.489152	0.693161	0.437111
1.00515	0.727654	0.477746	0.652331	0.435555
1.01839	0.795556	0.479895	0.612387	0.450294
1.02403	0.856758	0.498929	0.5744	0.484297
1.02368	0.908921	0.536618	0.539925	0.537547
1.01928	0.951058	0.591278	0.510787	0.605415
1.01316	0.982999	0.657398	0.489152	0.679779
1.00802	1.00515	0.727654	0.477746	0.752317
1.00696	1.01839	0.795556	0.479895	0.817078
1.01307	1.02403	0.856758	0.498929	0.870979
1.02861	1.02368	0.908921	0.536618	0.913091
1.05399	1.01928	0.951058	0.591278	0.943745
1.08664	1.01316	0.982999	0.657398	0.963915
1.12069	1.00802	1.00515	0.727654	0.974892
1.14846	1.00696	1.01839	0.795556	0.978159
1.16409	1.01307	1.02403	0.856758	0.975375
1.16606	1.02861	1.02368	0.908921	0.968408
1.15664	1.05399	1.01928	0.951058	0.959424
1.13977	1.08664	1.01316	0.982999	0.950999
1.11941	1.12069	1.00802	1.00515	0.946173
1.09882	1.14846	1.00696	1.01839	0.948241
1.08032	1.16409	1.01307	1.02403	0.960107
1.06528	1.16606	1.02861	1.02368	0.983209
1.05403	1.15664	1.05399	1.01928	1.01635
1.04582	1.13977	1.08664	1.01316	1.05496
1.0388	1.11941	1.12069	1.00802	1.09187
1.0301	1.09882	1.14846	1.00696	1.12045
1.01624	1.08032	1.16409	1.01307	1.1377
0.994057	1.06528	1.16606	1.02861	1.14454
0.962217	1.05403	1.15664	1.05399	1.14402
0.922357	1.04582	1.13977	1.08664	1.13966
0.878371	1.0388	1.11941	1.12069	1.13453
0.834564	1.0301	1.09882	1.14846	1.13089
0.794442	1.01624	1.08032	1.16409	1.1301
0.760492	0.994057	1.06528	1.16606	1.1325
0.734279	0.962217	1.05403	1.15664	1.1375
0.7165	0.922357	1.04582	1.13977	1.14358
0.706962	0.878371	1.0388	1.11941	1.14842
0.704642	0.834564	1.0301	1.09882	1.14885
0.707935	0.794442	1.01624	1.08032	1.14099
0.715074	0.760492	0.994057	1.06528	1.1213
0.724621	0.734279	0.962217	1.05403	1.08875
0.735929	0.7165	0.922357	1.04582	1.04612
0.749493	0.706962	0.878371	1.0388	0.998347
0.767103	0.704642	0.834564	1.0301	0.950077
0.791519	0.707935	0.794442	1.01624	0.90451
0.825182	0.715074	0.760492	0.994057	0.86342
0.868088	0.724621	0.734279	0.962217	0.827443
0.916763	0.735929	0.7165	0.922357	0.796336
0.965991	0.749493	0.706962	0.878371	0.769234
1.0115	0.767103	0.704642	0.834564	0.744943
1.05119	0.791519	0.707935	0.794442	0.722268
1.08482	0.825182	0.715074	0.760492	0.700329
1.11326	0.868088	0.724621	0.734279	0.67879
1.1378	0.916763	0.735929	0.7165	0.657993
1.15971	0.965991	0.749493	0.706962	0.639062
1.17995	1.0115	0.767103	0.704642	0.624067
1.19917	1.05119	0.791519	0.707935	0.616202
1.21767	1.08482	0.825182	0.715074	0.619596
1.23562	1.11326	0.868088	0.724621	0.638116
1.25313	1.1378	0.916763	0.735929	0.673182
1.27026	1.15971	0.965991	0.749493	0.72219
1.28676	1.17995	1.0115	0.767103	0.779439
1.30131	1.19917	1.05119	0.791519	0.838839
1.31039	1.21767	1.08482	0.825182	0.895902
1.30862	1.23562	1.11326	0.868088	0.94811
1.29176	1.25313	1.1378	0.916763	0.994388
1.25959	1.27026	1.15971	0.965991	1.03445
1.2153	1.28676	1.17995	1.0115	1.06836
1.16303	1.30131	1.19917	1.05119	1.09631
1.10636	1.31039	1.21767	1.08482	1.11854
1.04778	1.30862	1.23562	1.11326	1.13545
0.988943	1.29176	1.25313	1.1378	1.14767
0.930869	1.25959	1.27026	1.15971	1.15617
0.874211	1.2153	1.28676	1.17995	1.16251
0.819398	1.16303	1.30131	1.19917	1.16883
0.76672	1.10636	1.31039	1.21767	1.17771
0.716366	1.04778	1.30862	1.23562	1.19135
0.668447	0.988943	1.29176	1.25313	1.21032
0.623052	0.930869	1.25959	1.27026	1.23215
0.580355	0.874211	1.2153	1.28676	1.25106
0.540785	0.819398	1.16303	1.30131	1.25991
0.505158	0.76672	1.10636	1.31039	1.25373
0.474727	0.716366	1.04778	1.30862	1.23171
0.45124	0.668447	0.988943	1.29176	1.19642
0.437111	0.623052	0.930869	1.25959	1.15179
0.435555	0.580355	0.874211	1.2153	1.10167
0.450294	0.540785	0.819398	1.16303	1.04919
0.484297	0.505158	0.76672	1.10636	0.996719
0.537547	0.474727	0.716366	1.04778	0.94587
0.605415	0.45124	0.668447	0.988943	0.897629
0.679779	0.437111	0.623052	0.930869	0.85238
0.752317	0.435555	0.580355	0.874211	0.809894
0.817078	0.450294	0.540785	0.819398	0.76937
0.870979	0.484297	0.505158	0.76672	0.729698
0.913091	0.537547	0.474727	0.716366	0.689999
0.943745	0.605415	0.45124	0.668447	0.650204
0.963915	0.679779	0.437111	0.623052	0.61124
0.974892	0.752317	0.435555	0.580355	0.574717
0.978159	0.817078	0.450294	0.540785	0.542548
0.975375	0.870979	0.484297	0.505158	0.516859
0.968408	0.913091	0.537547	0.474727	0.500159
0.959424	0.943745	0.605415	0.45124	0.495469
0.950999	0.963915	0.679779	0.437111	0.506028
0.946173	0.974892	0.752317	0.435555	0.534194
0.948241	0.978159	0.817078	0.450294	0.579768
0.960107	0.975375	0.870979	0.484297	0.639026
0.983209	0.968408	0.913091	0.537547	0.705746
1.01635	0.959424	0.943745	0.605415	0.7735
1.05496	0.950999	0.963915	0.679779	0.837346
1.09187	0.946173	0.974892	0.752317	0.894172
1.12045	0.948241	0.978159	0.817078	0.94226
1.1377	0.960107	0.975375	0.870979	0.980781
1.14454	0.983209	0.968408	0.913091	1.00955
1.14402	1.01635	0.959424	0.943745	1.02897
1.13966	1.05496	0.950999	0.963915	1.04001
1.13453	1.09187	0.946173	0.974892	1.04407
1.13089	1.12045	0.948241	0.978159	1.04295
1.1301	1.1377	0.960107	0.975375	1.0388
1.1325	1.14454	0.983209	0.968408	1.03416
1.1375	1.14402	1.01635	0.959424	1.03195
1.14358	1.13966	1.05496	0.950999	1.03523
1.14842	1.13453	1.09187	0.946173	1.04659
1.14885	1.13089	1.12045	0.948241	1.06725
1.14099	1.1301	1.1377	0.960107	1.09601
1.1213	1.1325	1.14454	0.983209	1.12845
1.08875	1.1375	1.14402	1.01635	1.15734
1.04612	1.14358	1.13966	1.05496	1.17547
0.998347	1.14842	1.13453	1.09187	1.17918
0.950077	1.14885	1.13089	1.12045	1.16933
0.90451	1.14099	1.1301	1.1377	1.14956
0.86342	1.1213	1.1325	1.14454	1.1242
0.827443	1.08875	1.1375	1.14402	1.09702
0.796336	1.04612	1.14358	1.13966	1.07089
0.769234	0.998347	1.14842	1.13453	1.04766
0.744943	0.950077	1.14885	1.13089	1.02823
0.722268	0.90451	1.14099	1.1301	1.01242
0.700329	0.86342	1.1213	1.1325	0.998957
0.67879	0.827443	1.08875	1.1375	0.985524
0.657993	0.796336	1.04612	1.14358	0.969044
0.639062	0.769234	0.998347	1.14842	0.946459
0.624067	0.744943	0.950077	1.14885	0.915971
0.616202	0.722268	0.90451	1.14099	0.878198
0.619596	0.700329	0.86342	1.1213	0.8361
0.638116	0.67879	0.827443	1.08875	0.793597
0.673182	0.657993	0.796336	1.04612	0.754287
0.72219	0.639062	0.769234	0.998347	0.721015
0.779439	0.624067	0.744943	0.950077	0.695897
0.838839	0.616202	0.722268	0.90451	0.680324
0.895902	0.619596	0.700329	0.86342	0.674824
0.94811	0.638116	0.67879	0.827443	0.678921
0.994388	0.673182	0.657993	0.796336	0.691212
1.03445	0.72219	0.639062	0.769234	0.709753
1.06836	0.779439	0.624067	0.744943	0.732618
1.09631	0.838839	0.616202	0.722268	0.75846
1.11854	0.895902	0.619596	0.700329	0.786894
1.13545	0.94811	0.638116	0.67879	0.818608
1.14767	0.994388	0.673182	0.657993	0.854949
1.15617	1.03445	0.72219	0.639062	0.896729
1.16251	1.06836	0.779439	0.624067	0.942708
1.16883	1.09631	0.838839	0.616202	0.989362
1.17771	1.11854	0.895902	0.619596	1.03264
1.19135	1.13545	0.94811	0.638116	1.06985
1.21032	1.14767	0.994388	0.673182	1.10025
1.23215	1.15617	1.03445	0.72219	1.12456
1.25106	1.16251	1.06836	0.779439	1.14433
1.25991	1.16883	1.09631	0.838839	1.1614
1.25373	1.17771	1.11854	0.895902	1.17746
1.23171	1.19135	1.13545	0.94811	1.19377
1.19642	1.21032	1.14767	0.994388	1.21101
1.15179	1.23215	1.15617	1.03445	1.22926
1.10167	1.25106	1.16251	1.06836	1.24808
1.04919	1.25991	1.16883	1.09631	1.26658
0.996719	1.25373	1.17771	1.11854	1.2833
0.94587	1.23171	1.19135	1.13545	1.29581
0.897629	1.19642	1.21032	1.14767	1.30022
0.85238	1.15179	1.23215	1.15617	1.29192
0.809894	1.10167	1.25106	1.16251	1.26816
0.76937	1.04919	1.25991	1.16883	1.2301
0.729698	0.996719	1.25373	1.17771	1.18173
0.689999	0.94587	1.23171	1.19135	1.12745
0.650204	0.897629	1.19642	1.21032	1.0707
0.61124	0.85238	1.15179	1.23215	1.01371
0.574717	0.809894	1.10167	1.25106	0.957691
0.542548	0.76937	1.04919	1.25991	0.903159
0.516859	0.729698	0.996719	1.25373	0.850246
0.500159	0.689999	0.94587	1.23171	0.798946
0.495469	0.650204	0.897629	1.19642	0.749268
0.506028	0.61124	0.85238	1.15179	0.701321
0.534194	0.574717	0.809894	1.10167	0.655319
0.579768	0.542548	0.76937	1.04919	0.611582
0.639026	0.516859	0.729698	0.996719	0.570572
0.705746	0.500159	0.689999	0.94587	0.532985
0.7735	0.495469	0.650204	0.897629	0.499887
0.837346	0.506028	0.61124	0.85238	0.472844
0.894172	0.534194	0.574717	0.809894	0.454057
0.94226	0.579768	0.542548	0.76937	0.446486
0.980781	0.639026	0.516859	0.729698	0.453684
1.00955	0.705746	0.500159	0.689999	0.478892
1.02897	0.7735	0.495469	0.650204	0.523228
1.04001	0.837346	0.506028	0.61124	0.58397
1.04407	0.894172	0.534194	0.574717	0.654688
1.04295	0.94226	0.579768	0.542548	0.727526
1.0388	0.980781	0.639026	0.516859	0.795783
1.03416	1.00955	0.705746	0.500159	0.855126
1.03195	1.02897	0.7735	0.495469	0.903494
1.03523	1.04001	0.837346	0.506028	0.940444
1.04659	1.04407	0.894172	0.534194	0.966502
1.06725	1.04295	0.94226	0.579768	0.982726
1.09601	1.0388	0.980781	0.639026	0.99046
1.12845	1.03416	1.00955	0.705746	0.991254
1.15734	1.03195	1.02897	0.7735	0.986868
1.17547	1.03523	1.04001	0.837346	0.979341
1.17918	1.04659	1.04407	0.894172	0.971095
1.16933	1.06725	1.04295	0.94226	0.964999
1.14956	1.09601	1.0388	0.980781	0.964254
1.1242	1.12845	1.03416	1.00955	0.971924
1.09702	1.15734	1.03195	1.02897	0.990067
1.07089	1.17547	1.03523	1.04001	1.01868
1.04766	1.17918	1.04659	1.04407	1.05468
1.02823	1.16933	1.06725	1.04295	1.09177
1.01242	1.14956	1.09601	1.0388	1.12248
0.998957	1.1242	1.12845	1.03416	1.14188
0.985524	1.09702	1.15734	1.03195	1.14935
0.969044	1.07089	1.17547	1.03523	1.14747
0.946459	1.04766	1.17918	1.04659	1.13992
0.915971	1.02823	1.16933	1.06725	1.13021
0.878198	1.01242	1.14956	1.09601	1.12113
0.8361	0.998957	1.1242	1.12845	1.11455
0.793597	0.985524	1.09702	1.15734	1.11138
0.754287	0.969044	1.07089	1.17547	1.11148
0.721015	0.946459	1.04766	1.17918	1.11373
0.695897	0.915971	1.02823	1.16933	1.11603
0.680324	0.878198	1.01242	1.14956	1.11539
0.674824	0.8361	0.998957	1.1242	1.10817
0.678921	0.793597	0.985524	1.09702	1.09071
0.691212	0.754287	0.969044	1.07089	1.06118
0.709753	0.721015	0.946459	1.04766	1.0212
0.732618	0.695897	0.915971	1.02823	0.975182
0.75846	0.680324	0.878198	1.01242	0.927954
0.786894	0.674824	0.8361	0.998957	0.883199
0.818608	0.678921	0.793597	0.985524	0.843204
0.854949	0.691212	0.754287	0.969044	0.809078
0.896729	0.709753	0.721015	0.946459	0.780962
0.942708	0.732618	0.695897	0.915971	0.758218
0.989362	0.75846	0.680324	0.878198	0.739658
1.03264	0.786894	0.674824	0.8361	0.723859
1.06985	0.818608	0.678921	0.793597	0.70953
1.10025	0.854949	0.691212	0.754287	0.69586
1.12456	0.896729	0.709753	0.721015	0.682777
1.14433	0.942708	0.732618	0.695897	0.671134
1.1614	0.989362	0.75846	0.680324	0.662875
1.17746	1.03264	0.786894	0.674824	0.661161
1.19377	1.06985	0.818608	0.678921	0.670098
1.21101	1.10025	0.854949	0.691212	0.693355
1.22926	1.12456	0.896729	0.709753	0.731774
1.24808	1.14433	0.942708	0.732618	0.782001
1.26658	1.1614	0.989362	0.75846	0.838012
1.2833	1.17746	1.03264	0.786894	0.894073
1.29581	1.19377	1.06985	0.818608	0.946455
1.30022	1.21101	1.10025	0.854949	0.993457
1.29192	1.22926	1.12456	0.896729	1.0347
1.26816	1.24808	1.14433	0.942708	1.07043
1.2301	1.26658	1.1614	0.989362	1.1011
1.18173	1.2833	1.17746	1.03264	1.12713
1.12745	1.29581	1.19377	1.06985	1.14887
1.0707	1.30022	1.21101	1.10025	1.16669
1.01371	1.29192	1.22926	1.12456	1.18108
0.957691	1.26816	1.24808	1.14433	1.19281
0.903159	1.2301	1.26658	1.1614	1.20316
0.850246	1.18173	1.2833	1.17746	1.21391
0.798946	1.12745	1.29581	1.19377	1.22705
0.749268	1.0707	1.30022	1.21101	1.24368
0.701321	1.01371	1.29192	1.22926	1.26244
0.655319	0.957691	1.26816	1.24808	1.27853
0.611582	0.903159	1.2301	1.26658	1.28515
0.570572	0.850246	1.18173	1.2833	1.2771
0.532985	0.798946	1.12745	1.29581	1.25321
0.499887	0.749268	1.0707	1.30022	1.21578
0.472844	0.701321	1.01371	1.29192	1.16856
0.454057	0.655319	0.957691	1.26816	1.11525
0.446486	0.611582	0.903159	1.2301	1.05891
0.453684	0.570572	0.850246	1.18173	1.00182
0.478892	0.532985	0.798946	1.12745	0.945624
0.523228	0.499887	0.749268	1.0707	0.89142
0.58397	0.472844	0.701321	1.01371	0.839826
0.654688	0.454057	0.655319	0.957691	0.791033
0.727526	0.446486	0.611582	0.903159	0.744824
0.795783	0.453684	0.570572	0.850246	0.700671
0.855126	0.478892	0.532985	0.798946	0.658017
0.903494	0.523228	0.499887	0.749268	0.616694
0.940444	0.58397	0.472844	0.701321	0.577212
0.966502	0.654688	0.454057	0.655319	0.540687
0.982726	0.727526	0.446486	0.611582	0.508616
0.99046	0.795783	0.453684	0.570572	0.482812
0.991254	0.855126	0.478892	0.532985	0.46559
0.986868	0.903494	0.523228	0.499887	0.459975
0.979341	0.940444	0.58397	0.472844	0.469578
0.971095	0.966502	0.654688	0.454057	0.497585
0.964999	0.982726	0.727526	0.446486	0.544704
0.964254	0.99046	0.795783	0.453684	0.607377
0.971924	0.991254	0.855126	0.478892	0.678417
0.990067	0.986868	0.903494	0.523228	0.749945
1.01868	0.979341	0.940444	0.58397	0.815953
1.05468	0.971095	0.966502	0.654688	0.872987
1.09177	0.964999	0.982726	0.727526	0.919569
1.12248	0.964254	0.99046	0.795783	0.95542
1.14188	0.971924	0.991254	0.855126	0.980946
1.14935	0.990067	0.986868	0.903494	0.997005
1.14747	1.01868	0.979341	0.940444	1.00481
1.13992	1.05468	0.971095	0.966502	1.00588
1.13021	1.09177	0.964999	0.982726	1.00199
1.12113	1.12248	0.964254	0.99046	0.995209
1.11455	1.14188	0.971924	0.991254	0.98801
1.11138	1.14935	0.990067	0.986868	0.983314
1.11148	1.14747	1.01868	0.979341	0.984355
1.11373	1.13992	1.05468	0.971095	0.994114
1.11603	1.13021	1.09177	0.964999	1.01433
1.11539	1.12113	1.12248	0.964254	1.04431
1.10817	1.11455	1.14188	0.971924	1.08006
1.09071	1.11138	1.14935	0.990067	1.11461
1.06118	1.11148	1.14747	1.01868	1.14071
1.0212	1.11373	1.13992	1.05468	1.15435
0.975182	1.11603	1.13021	1.09177	1.1558
0.927954	1.11539	1.12113	1.12248	1.14811
0.883199	1.10817	1.11455	1.14188	1.13515
0.843204	1.09071	1.11138	1.14935	1.12045
0.809078	1.06118	1.11148	1.14747	1.10674
0.780962	1.0212	1.11373	1.13992	1.09583
0.758218	0.975182	1.11603	1.13021	1.08853
0.739658	0.927954	1.11539	1.12113	1.08462
0.723859	0.883199	1.10817	1.11455	1.08284
0.70953	0.843204	1.09071	1.11138	1.08084
0.69586	0.809078	1.06118	1.11148	1.07537
0.682777	0.780962	1.0212	1.11373	1.06271
0.671134	0.758218	0.975182	1.11603	1.03975
0.662875	0.739658	0.927954	1.11539	1.00585
0.661161	0.723859	0.883199	1.10817	0.963711
0.670098	0.70953	0.843204	1.09071	0.917897
0.693355	0.69586	0.809078	1.06118	0.872789
0.731774	0.682777	0.780962	1.0212	0.8316
0.782001	0.671134	0.758218	0.975182	0.796345
0.838012	0.662875	0.739658	0.927954	0.76802
0.894073	0.661161	0.723859	0.883199	0.746713
0.946455	0.670098	0.70953	0.843204	0.731717
0.993457	0.693355	0.69586	0.809078	0.721726
1.0347	0.731774	0.682777	0.780962	0.715156
1.07043	0.782001	0.671134	0.758218	0.710555
1.1011	0.838012	0.662875	0.739658	0.707014
1.12713	0.894073	0.661161	0.723859	0.704509
1.14887	0.946455	0.670098	0.70953	0.704173
1.16669	0.993457	0.693355	0.69586	0.708451
1.18108	1.0347	0.731774	0.682777	0.720935
1.19281	1.07043	0.782001	0.671134	0.745256
1.20316	1.1011	0.838012	0.662875	0.782804
1.21391	1.12713	0.894073	0.661161	0.830944
1.22705	1.14887	0.946455	0.670098	0.884072
1.24368	1.16669	0.993457	0.693355	0.936599
1.26244	1.18108	1.0347	0.731774	0.984935
1.27853	1.19281	1.07043	0.782001	1.02764
1.28515	1.20316	1.1011	0.838012	1.0647
1.2771	1.21391	1.12713	0.894073	1.09677
1.25321	1.22705	1.14887	0.946455	1.12469
1.21578	1.24368	1.16669	0.993457	1.14917
1.16856	1.26244	1.18108	1.0347	1.17075
1.11525	1.27853	1.19281	1.07043	1.18983
1.05891	1.28515	1.20316	1.1011	1.20677
1.00182	1.2771	1.21391	1.12713	1.22205
0.945624	1.25321	1.22705	1.14887	1.23643
0.89142	1.21578	1.24368	1.16669	1.25097
0.839826	1.16856	1.26244	1.18108	1.26664
0.791033	1.11525	1.27853	1.19281	1.28324
0.744824	1.05891	1.28515	1.20316	1.29782
0.700671	1.00182	1.2771	1.21391	1.30459
0.658017	0.945624	1.25321	1.22705	1.29776
0.616694	0.89142	1.21578	1.24368	1.27509
0.577212	0.839826	1.16856	1.26244	1.23829
0.540687	0.791033	1.11525	1.27853	1.19102
0.508616	0.744824	1.05891	1.28515	1.137
0.482812	0.700671	1.00182	1.2771	1.07931
0.46559	0.658017	0.945624	1.25321	1.0202
0.459975	0.616694	0.89142	1.21578	0.961279
0.469578	0.577212	0.839826	1.16856	0.903668
0.497585	0.540687	0.791033	1.11525	0.848094
0.544704	0.508616	0.744824	1.05891	0.794983
0.607377	0.482812	0.700671	1.00182	0.744498
0.678417	0.46559	0.658017	0.945624	0.696575
0.749945	0.459975	0.616694	0.89142	0.651015
0.815953	0.469578	0.577212	0.839826	0.607694
0.872987	0.497585	0.540687	0.791033	0.566833
0.919569	0.544704	0.508616	0.744824	0.529141
0.95542	0.607377	0.482812	0.700671	0.495763
0.980946	0.678417	0.46559	0.658017	0.468218
0.997005	0.749945	0.459975	0.616694	0.44853
1.00481	0.815953	0.469578	0.577212	0.439462
1.00588	0.872987	0.497585	0.540687	0.444574
1.00199	0.919569	0.544704	0.508616	0.467582
0.995209	0.95542	0.607377	0.482812	0.510497
0.98801	0.980946	0.678417	0.46559	0.571226
0.983314	0.997005	0.749945	0.459975	0.643037
0.984355	1.00481	0.815953	0.469578	0.717201
0.994114	1.00588	0.872987	0.497585	0.786397
1.01433	1.00199	0.919569	0.544704	0.846214
1.04431	0.995209	0.95542	0.607377	0.894789
1.08006	0.98801	0.980946	0.678417	0.931872
1.11461	0.983314	0.997005	0.749945	0.958063
1.14071	0.984355	1.00481	0.815953	0.974406
1.15435	0.994114	1.00588	0.872987	0.982215
1.1558	1.01433	1.00199	0.919569	0.983016
1.14811	1.04431	0.995209	0.95542	0.978538
1.13515	1.08006	0.98801	0.980946	0.970757
1.12045	1.11461	0.983314	0.997005	0.961995
1.10674	1.14071	0.984355	1.00481	0.955037
1.09583	1.15435	0.994114	1.00588	0.953102
1.08853	1.1558	1.01433	1.00199	0.959446
1.08462	1.14811	1.04431	0.995209	0.97646
1.08284	1.13515	1.08006	0.98801	1.00446
1.08084	1.12045	1.11461	0.983314	1.04063
1.07537	1.10674	1.14071	0.984355	1.07886
1.06271	1.09583	1.15435	0.994114	1.11173
1.03975	1.08853	1.1558	1.01433	1.13408
1.00585	1.08462	1.14811	1.04431	1.14488
0.963711	1.08284	1.13515	1.08006	1.14634
0.917897	1.08084	1.12045	1.11461	1.14193
0.872789	1.07537	1.10674	1.14071	1.1351
0.8316	1.06271	1.09583	1.15435	1.12862
0.796345	1.03975	1.08853	1.1558	1.1244
0.76802	1.00585	1.08462	1.14811	1.12339
0.746713	0.963711	1.08284	1.13515	1.12554
0.731717	0.917897	1.08084	1.12045	1.12986
0.721726	0.872789	1.07537	1.10674	1.13442
0.715156	0.8316	1.06271	1.09583	1.1364
0.710555	0.796345	1.03975	1.08853	1.13219
0.707014	0.76802	1.00585	1.08462	1.11791
0.704509	0.746713	0.963711	1.08284	1.09109
0.704173	0.731717	0.917897	1.08084	1.05273
0.708451	0.721726	0.872789	1.07537	1.00703
0.720935	0.715156	0.8316	1.06271	0.958963
0.745256	0.710555	0.796345	1.03975	0.912457
0.782804	0.707014	0.76802	1.00585	0.869983
0.830944	0.704509	0.746713	0.963711	0.832751
0.884072	0.704173	0.731717	0.917897	0.800976
0.936599	0.708451	0.721726	0.872789	0.774096
0.984935	0.720935	0.715156	0.8316	0.751023
1.02764	0.745256	0.710555	0.796345	0.730448
1.0647	0.782804	0.707014	0.76802	0.711187
1.09677	0.830944	0.704509	0.746713	0.692488
1.12469	0.884072	0.704173	0.731717	0.674255
1.14917	0.936599	0.708451	0.721726	0.657194
1.17075	0.984935	0.720935	0.715156	0.642957
1.18983	1.02764	0.745256	0.710555	0.634327
1.20677	1.0647	0.782804	0.707014	0.635198
1.22205	1.09677	0.830944	0.704509	0.649742
1.23643	1.12469	0.884072	0.704173	0.680387
1.25097	1.14917	0.936599	0.708451	0.725742
1.26664	1.17075	0.984935	0.720935	0.780718
1.28324	1.18983	1.02764	0.745256	0.839059
1.29782	1.20677	1.0647	0.782804	0.8958
1.30459	1.22205	1.09677	0.830944	0.948054
1.29776	1.23643	1.12469	0.884072	0.994598
1.27509	1.25097	1.14917	0.936599	1.03517
1.23829	1.26664	1.17075	0.984935	1.06992
1.19102	1.28324	1.18983	1.02764	1.09912
1.137	1.29782	1.20677	1.0647	1.12307
1.07931	1.30459	1.22205	1.09677	1.14208
1.0202	1.29776	1.23643	1.12469	1.15662
0.961279	1.27509	1.25097	1.14917	1.16747
0.903668	1.23829	1.26664	1.17075	1.17583
0.848094	1.19102	1.28324	1.18983	1.18355
0.794983	1.137	1.29782	1.20677	1.19295
0.744498	1.07931	1.30459	1.22205	1.20623
0.696575	1.0202	1.29776	1.23643	1.22418
0.651015	0.961279	1.27509	1.25097	1.24475
0.607694	0.903668	1.23829	1.26664	1.26244
0.566833	0.848094	1.19102	1.28324	1.27023
0.529141	0.794983	1.137	1.29782	1.26308
0.495763	0.744498	1.07931	1.30459	1.24009
0.468218	0.696575	1.0202	1.29776	1.20373
0.44853	0.651015	0.961279	1.27509	1.15785
0.439462	0.607694	0.903668	1.23829	1.10621
0.444574	0.566833	0.848094	1.19102	1.05193
0.467582	0.529141	0.794983	1.137	0.997344
0.510497	0.495763	0.744498	1.07931	0.94409
0.571226	0.468218	0.696575	1.0202	0.893205
0.643037	0.44853	0.651015	0.961279	0.845183
0.717201	0.439462	0.607694	0.903668	0.799985
0.786397	0.444574	0.566833	0.848094	0.757063
0.846214	0.467582	0.529141	0.794983	0.715546
0.894789	0.510497	0.495763	0.744498	0.674674
0.931872	0.571226	0.468218	0.696575	0.63433
0.958063	0.643037	0.44853	0.651015	0.595262
0.974406	0.717201	0.439462	0.607694	0.558871
0.982215	0.786397	0.444574	0.566833	0.526896
0.983016	0.846214	0.467582	0.529141	0.501338
0.978538	0.894789	0.510497	0.495763	0.484643
0.970757	0.931872	0.571226	0.468218	0.479866
0.961995	0.958063	0.643037	0.44853	0.490436
0.955037	0.974406	0.717201	0.439462	0.519057
0.953102	0.982215	0.786397	0.444574	0.565834
0.959446	0.983016	0.846214	0.467582	0.626985
0.97646	0.978538	0.894789	0.510497	0.695792
1.00446	0.970757	0.931872	0.571226	0.765211
1.04063	0.961995	0.958063	0.643037	0.829888
1.07886	0.955037	0.974406	0.717201	0.88661
1.11173	0.953102	0.982215	0.786397	0.933795
1.13408	0.959446	0.983016	0.846214	0.970879
1.14488	0.97646	0.978538	0.894789	0.997956
1.14634	1.00446	0.970757	0.931872	1.01565
1.14193	1.04063	0.961995	0.958063	1.02505
1.1351	1.07886	0.955037	0.974406	1.02762
1.12862	1.11173	0.953102	0.982215	1.02515
1.1244	1.13408	0.959446	0.983016	1.01977
1.12339	1.14488	0.97646	0.978538	1.014
1.12554	1.14634	1.00446	0.970757	1.01077
1.12986	1.14193	1.04063	0.961995	1.01323
1.13442	1.1351	1.07886	0.955037	1.02414
1.1364	1.12862	1.11173	0.953102	1.0449
1.13219	1.1244	1.13408	0.959446	1.07446
1.11791	1.12339	1.14488	0.97646	1.10847
1.09109	1.12554	1.14634	1.00446	1.13975
1.05273	1.12986	1.14193	1.04063	1.16107
1.00703	1.13442	1.1351	1.07886	1.16874
0.958963	1.1364	1.12862	1.11173	1.16347
0.912457	1.13219	1.1244	1.13408	1.14869
0.869983	1.11791	1.12339	1.14488	1.12854
0.832751	1.09109	1.12554	1.14634	1.10668
0.800976	1.05273	1.12986	1.14193	1.08592
0.774096	1.00703	1.13442	1.1351	1.06808
0.751023	0.958963	1.1364	1.12862	1.05401
0.730448	0.912457	1.13219	1.1244	1.04351
0.711187	0.869983	1.11791	1.12339	1.03525
0.692488	0.832751	1.09109	1.12554	1.02682
0.674255	0.800976	1.05273	1.12986	1.015
0.657194	0.774096	1.00703	1.13442	0.996351
0.642957	0.751023	0.958963	1.1364	0.968567
0.634327	0.730448	0.912457	1.13219	0.931905
0.635198	0.711187	0.869983	1.11791	0.889386
0.649742	0.692488	0.832751	1.09109	0.845279
0.680387	0.674255	0.800976	1.05273	0.803488
0.725742	0.657194	0.774096	1.00703	0.76696
0.780718	0.642957	0.751023	0.958963	0.737702
0.839059	0.634327	0.730448	0.912457	0.716867
0.8958	0.635198	0.711187	0.869983	0.70473
0.948054	0.649742	0.692488	0.832751	0.700674
0.994598	0.680387	0.674255	0.800976	0.703324
1.03517	0.725742	0.657194	0.774096	0.710906
1.06992	0.780718	0.642957	0.751023	0.721725
1.09912	0.839059	0.634327	0.730448	0.734665
1.12307	0.8958	0.635198	0.711187	0.74961
1.14208	0.948054	0.649742	0.692488	0.767688
1.15662	0.994598	0.680387	0.674255	0.791181
1.16747	1.03517	0.725742	0.657194	0.822656
1.17583	1.06992	0.780718	0.642957	0.863089
1.18355	1.09912	0.839059	0.634327	0.910203
1.19295	1.12307	0.8958	0.635198	0.95921
1.20623	1.14208	0.948054	0.649742	1.00543
1.22418	1.15662	0.994598	0.680387	1.04612
1.24475	1.16747	1.03517	0.725742	1.08058
1.26244	1.17583	1.06992	0.780718	1.10946
1.27023	1.18355	1.09912	0.839059	1.13408
1.26308	1.19295	1.12307	0.8958	1.15581
1.24009	1.20623	1.14208	0.948054	1.17583
1.20373	1.22418	1.15662	0.994598	1.19492
1.15785	1.24475	1.16747	1.03517	1.2135
1.10621	1.26244	1.17583	1.06992	1.23172
1.05193	1.27023	1.18355	1.09912	1.24961
0.997344	1.26308	1.19295	1.12307	1.2671
0.94409	1.24009	1.20623	1.14208	1.2839
0.893205	1.20373	1.22418	1.15662	1.29883
0.845183	1.15785	1.24475	1.16747	1.30885
0.799985	1.10621	1.26244	1.17583	1.3089
0.757063	1.05193	1.27023	1.18355	1.29436
0.715546	0.997344	1.26308	1.19295	1.26427
0.674674	0.94409	1.24009	1.20623	1.22144
0.63433	0.893205	1.20373	1.22418	1.17007
0.595262	0.845183	1.15785	1.24475	1.11392
0.558871	0.799985	1.10621	1.26244	1.05568
0.526896	0.757063	1.05193	1.27023	0.997083
0.501338	0.715546	0.997344	1.26308	0.939177
0.484643	0.674674	0.94409	1.24009	0.882598
0.479866	0.63433	0.893205	1.20373	0.827752
0.490436	0.595262	0.845183	1.15785	0.77492
0.519057	0.558871	0.799985	1.10621	0.724303
0.565834	0.526896	0.757063	1.05193	0.676043
0.626985	0.501338	0.715546	0.997344	0.630262
0.695792	0.484643	0.674674	0.94409	0.587145
0.765211	0.479866	0.63433	0.893205	0.547083
0.829888	0.490436	0.595262	0.845183	0.510829
0.88661	0.519057	0.558871	0.799985	0.479567
0.933795	0.565834	0.526896	0.757063	0.454977
0.970879	0.626985	0.501338	0.715546	0.439383
0.997956	0.695792	0.484643	0.674674	0.435901
1.01565	0.765211	0.479866	0.63433	0.44821
1.02505	0.829888	0.490436	0.595262	0.479447
1.02762	0.88661	0.519057	0.558871	0.530092
1.02515	0.933795	0.565834	0.526896	0.596178
1.01977	0.970879	0.626985	0.501338	0.669983
1.014	0.997956	0.695792	0.484643	0.743098
1.01077	1.01565	0.765211	0.479866	0.809187
1.01323	1.02505	0.829888	0.490436	0.864768
1.02414	1.02762	0.88661	0.519057	0.908626
1.0449	1.02515	0.933795	0.565834	0.940939
1.07446	1.01977	0.970879	0.626985	0.962604
1.10847	1.014	0.997956	0.695792	0.974874
1.13975	1.01077	1.01565	0.765211	0.979209
1.16107	1.01323	1.02505	0.829888	0.97724
1.16874	1.02414	1.02762	0.88661	0.970804
1.16347	1.0449	1.02515	0.933795	0.962023
1.14869	1.07446	1.01977	0.970879	0.953417
1.12854	1.10847	1.014	0.997956	0.947965
1.10668	1.13975	1.01077	1.01565	0.948946
1.08592	1.16107	1.01323	1.02505	0.959356
1.06808	1.16874	1.02414	1.02762	0.980889
1.05401	1.16347	1.0449	1.02515	1.01278
1.04351	1.14869	1.07446	1.01977	1.05092
1.03525	1.12854	1.10847	1.014	1.08838
1.02682	1.10668	1.13975	1.01077	1.11819
1.015	1.08592	1.16107	1.01323	1.13677
0.996351	1.06808	1.16874	1.02414	1.14458
0.968567	1.05401	1.16347	1.0449	1.14451
0.931905	1.04351	1.14869	1.07446	1.14011
0.889386	1.03525	1.12854	1.10847	1.13455
0.845279	1.02682	1.10668	1.13975	1.13024
0.803488	1.015	1.08592	1.16107	1.12866
0.76696	0.996351	1.06808	1.16874	1.1303
0.737702	0.968567	1.05401	1.16347	1.13471
0.716867	0.931905	1.04351	1.14869	1.14048
0.70473	0.889386	1.03525	1.12854	1.14539
0.700674	0.845279	1.02682	1.10668	1.14636
0.703324	0.803488	1.015	1.08592	1.13959
0.710906	0.76696	0.996351	1.06808	1.12141
0.721725	0.737702	0.968567	1.05401	1.09037
0.734665	0.716867	0.931905	1.04351	1.04877
0.74961	0.70473	0.889386	1.03525	1.00143
0.767688	0.700674	0.845279	1.02682	0.953131
0.791181	0.703324	0.803488	1.015	0.907262
0.822656	0.710906	0.76696	0.996351	0.865777
0.863089	0.721725	0.737702	0.968567	0.82945
0.910203	0.734665	0.716867	0.931905	0.798145
0.95921	0.74961	0.70473	0.889386	0.771061
1.00543	0.767688	0.700674	0.845279	0.747017
1.04612	0.791181	0.703324	0.803488	0.72478
1.08058	0.822656	0.710906	0.76696	0.703391
1.10946	0.863089	0.721725	0.737702	0.682413
1.13408	0.910203	0.734665	0.716867	0.662087
1.15581	0.95921	0.74961	0.70473	0.643433
1.17583	1.00543	0.767688	0.700674	0.628409
1.19492	1.04612	0.791181	0.703324	0.620096
1.2135	1.08058	0.822656	0.710906	0.622568
1.23172	1.10946	0.863089	0.721725	0.639804
1.24961	1.13408	0.910203	0.734665	0.673535
1.2671	1.15581	0.95921	0.74961	0.721504
1.2839	1.17583	1.00543	0.767688	0.778165
1.29883	1.19492	1.04612	0.791181	0.837362
1.30885	1.2135	1.08058	0.822656	0.894458
1.3089	1.23172	1.10946	0.863089	0.946823
1.29436	1.24961	1.13408	0.910203	0.993326
1.26427	1.2671	1.15581	0.95921	1.03368
1.22144	1.2839	1.17583	1.00543	1.06795
1.17007	1.29883	1.19492	1.04612	1.09634
1.11392	1.30885	1.2135	1.08058	1.1191
1.05568	1.3089	1.23172	1.10946	1.13661
0.997083	1.29436	1.24961	1.13408	1.14944
0.939177	1.26427	1.2671	1.15581	1.15852
0.882598	1.22144	1.2839	1.17583	1.16531
0.827752	1.17007	1.29883	1.19492	1.17188
0.77492	1.11392	1.30885	1.2135	1.18075
0.724303	1.05568	1.3089	1.23172	1.19416
0.676043	0.997083	1.29436	1.24961	1.21278
0.630262	0.939177	1.26427	1.2671	1.23432
0.587145	0.882598	1.22144	1.2839	1.25314
0.547083	0.827752	1.17007	1.29883	1.2621
0.510829	0.77492	1.11392	1.30885	1.25612
0.479567	0.724303	1.05568	1.3089	1.23427
0.454977	0.676043	0.997083	1.29436	1.19904
0.439383	0.630262	0.939177	1.26427	1.15431
0.435901	0.587145	0.882598	1.22144	1.10394
0.44821	0.547083	0.827752	1.17007	1.05107
0.479447	0.510829	0.77492	1.11392	0.998094
0.530092	0.479567	0.724303	1.05568	0.946642
0.596178	0.454977	0.676043	0.997083	0.897729
0.669983	0.439383	0.630262	0.939177	0.85178
0.743098	0.435901	0.587145	0.882598	0.808625
0.809187	0.44821	0.547083	0.827752	0.767533
0.864768	0.479447	0.510829	0.77492	0.727447
0.908626	0.530092	0.479567	0.724303	0.6875
0.940939	0.596178	0.454977	0.676043	0.647586
0.962604	0.669983	0.439383	0.630262	0.608568
0.974874	0.743098	0.435901	0.587145	0.571998
0.979209	0.809187	0.44821	0.547083	0.539744
0.97724	0.864768	0.479447	0.510829	0.513899
0.970804	0.908626	0.530092	0.479567	0.496946
0.962023	0.940939	0.596178	0.454977	0.491905
0.953417	0.962604	0.669983	0.439383	0.502063
0.947965	0.974874	0.743098	0.435901	0.529899
0.948946	0.979209	0.809187	0.44821	0.57536
0.959356	0.97724	0.864768	0.479447	0.63479
0.980889	0.970804	0.908626	0.530092	0.701891
1.01278	0.962023	0.940939	0.596178	0.770077
1.05092	0.953417	0.962604	0.669983	0.834264
1.08838	0.947965	0.974874	0.743098	0.891276
1.11819	0.948946	0.979209	0.809187	0.939395
1.13677	0.959356	0.97724	0.864768	0.977833
1.14458	0.980889	0.970804	0.908626	1.00645
1.14451	1.01278	0.962023	0.940939	1.0257
1.14011	1.05092	0.953417	0.962604	1.03655
1.13455	1.08838	0.947965	0.974874	1.04042
1.13024	1.11819	0.948946	0.979209	1.0391
1.12866	1.13677	0.959356	0.97724	1.03471
1.1303	1.14458	0.980889	0.970804	1.02979
1.13471	1.14451	1.01278	0.962023	1.02725
1.14048	1.14011	1.05092	0.953417	1.03017
1.14539	1.13455	1.08838	0.947965	1.04121
1.14636	1.13024	1.11819	0.948946	1.06167
1.13959	1.12866	1.13677	0.959356	1.09046
1.12141	1.1303	1.14458	0.980889	1.12324
1.09037	1.13471	1.14451	1.01278	1.15284
1.04877	1.14048	1.14011	1.05092	1.172
1.00143	1.14539	1.13455	1.08838	1.17693
0.953131	1.14636	1.13024	1.11819	1.16837
0.907262	1.13959	1.12866	1.13677	1.14988
0.865777	1.12141	1.1303	1.14458	1.12575
0.82945	1.09037	1.13471	1.14451	1.09974
0.798145	1.04877	1.14048	1.14011	1.07473
0.771061	1.00143	1.14539	1.13455	1.05261
0.747017	0.953131	1.14636	1.13024	1.03427
0.72478	0.907262	1.13959	1.12866	1.01956
0.703391	0.865777	1.12141	1.1303	1.00723
0.682413	0.82945	1.09037	1.13471	0.994954
0.662087	0.798145	1.04877	1.14048	0.979618
0.643433	0.771061	1.00143	1.14539	0.958067
0.628409	0.747017	0.953131	1.14636	0.928346
0.620096	0.72478	0.907262	1.13959	0.890941
0.622568	0.703391	0.865777	1.12141	0.848791
0.639804	0.682413	0.82945	1.09037	0.805891
0.673535	0.662087	0.798145	1.04877	0.765926
0.721504	0.643433	0.771061	1.00143	0.731776
0.778165	0.628409	0.747017	0.953131	0.705549
0.837362	0.620096	0.72478	0.907262	0.688596
0.894458	0.622568	0.703391	0.865777	0.681409
0.946823	0.639804	0.682413	0.82945	0.6835
0.993326	0.673535	0.662087	0.798145	0.693494
1.03368	0.721504	0.643433	0.771061	0.709496
1.06795	0.778165	0.628409	0.747017	0.729633
1.09634	0.837362	0.620096	0.72478	0.752597
1.1191	0.894458	0.622568	0.703391	0.778055
1.13661	0.946823	0.639804	0.682413	0.806801
1.14944	0.993326	0.673535	0.662087	0.84043
1.15852	1.03368	0.721504	0.643433	0.880205
1.16531	1.06795	0.778165	0.628409	0.925379
1.17188	1.09634	0.837362	0.620096	0.972606
1.18075	1.1191	0.894458	0.622568	1.01754
1.19416	1.13661	0.946823	0.639804	1.05702
1.21278	1.14944	0.993326	0.673535	1.08983
1.23432	1.15852	1.03368	0.721504	1.11642
1.25314	1.16531	1.06795	0.778165	1.13817
1.2621	1.17188	1.09634	0.837362	1.15681
1.25612	1.18075	1.1191	0.894458	1.17398
1.23427	1.19416	1.13661	0.946823	1.19094
1.19904	1.21278	1.14944	0.993326	1.20841
1.15431	1.23432	1.15852	1.03368	1.22659
1.10394	1.25314	1.16531	1.06795	1.24521
1.05107	1.2621	1.17188	1.09634	1.26366
0.998094	1.25612	1.18075	1.1191	1.2809
0.946642	1.23427	1.19416	1.13661	1.29504
0.897729	1.19904	1.21278	1.14944	1.30277
0.85178	1.15431	1.23432	1.15852	1.29939
0.808625	1.10394	1.25314	1.16531	1.28106
0.767533	1.05107	1.2621	1.17188	1.24759
0.727447	0.998094	1.25612	1.18075	1.20226
0.6875	0.946642	1.23427	1.19416	1.14951
0.647586	0.897729	1.19904	1.21278	1.09314
0.608568	0.85178	1.15431	1.23432	1.03572
0.571998	0.808625	1.10394	1.25314	0.978763
0.539744	0.767533	1.05107	1.2621	0.923032
0.513899	0.727447	0.998094	1.25612	0.868825
0.496946	0.6875	0.946642	1.23427	0.81625
0.491905	0.647586	0.897729	1.19904	0.76538
0.502063	0.608568	0.85178	1.15431	0.716333
0.529899	0.571998	0.808625	1.10394	0.669294
0.57536	0.539744	0.767533	1.05107	0.624517
0.63479	0.513899	0.727447	0.998094	0.58236
0.701891	0.496946	0.6875	0.946642	0.543381
0.770077	0.491905	0.647586	0.897729	0.508471
0.834264	0.502063	0.608568	0.85178	0.478978
0.891276	0.529899	0.571998	0.808625	0.456826
0.939395	0.57536	0.539744	0.767533	0.444659
0.977833	0.63479	0.513899	0.727447	0.445853
1.00645	0.701891	0.496946	0.6875	0.463968
1.0257	0.770077	0.491905	0.647586	0.501258
1.03655	0.834264	0.502063	0.608568	0.556657
1.04042	0.891276	0.529899	0.571998	0.624931
1.0391	0.939395	0.57536	0.539744	0.69827
1.03471	0.977833	0.63479	0.513899	0.769144
1.02979	1.00645	0.701891	0.496946	0.832221
1.02725	1.0257	0.770077	0.491905	0.884677
1.03017	1.03655	0.834264	0.502063	0.925615
1.04121	1.04042	0.891276	0.529899	0.95533
1.06167	1.0391	0.939395	0.57536	0.974761
1.09046	1.03471	0.977833	0.63479	0.985187
1.12324	1.02979	1.00645	0.701891	0.988098
1.15284	1.02725	1.0257	0.770077	0.985171
1.172	1.03017	1.03655	0.834264	0.978331
1.17693	1.04121	1.04042	0.891276	0.969835
1.16837	1.06167	1.0391	0.939395	0.962373
1.14988	1.09046	1.03471	0.977833	0.959055
1.12575	1.12324	1.02979	1.00645	0.963096
1.09974	1.15284	1.02725	1.0257	0.977089
1.07473	1.172	1.03017	1.03655	1.00198
1.05261	1.17693	1.04121	1.04042	1.03596
1.03427	1.16837	1.06167	1.0391	1.07387
1.01956	1.14988	1.09046	1.03471	1.1083
1.00723	1.12575	1.12324	1.02979	1.13299
0.994954	1.09974	1.15284	1.02725	1.1457
0.979618	1.07473	1.172	1.03017	1.148
0.958067	1.05261	1.17693	1.04121	1.14331
0.928346	1.03427	1.16837	1.06167	1.13524
0.890941	1.01956	1.14988	1.09046	1.12686
0.848791	1.00723	1.12575	1.12324	1.12037
0.805891	0.994954	1.09974	1.15284	1.11701
0.765926	0.979618	1.07473	1.172	1.11703
0.731776	0.958067	1.05261	1.17693	1.11966
0.705549	0.928346	1.03427	1.16837	1.12318
0.688596	0.890941	1.01956	1.14988	1.12498
0.681409	0.848791	1.00723	1.12575	1.12163
0.6835	0.805891	0.994954	1.09974	1.1093
0.693494	0.765926	0.979618	1.07473	1.08509
0.709496	0.731776	0.958067	1.05261	1.04907
0.729633	0.705549	0.928346	1.03427	1.0048
0.752597	0.688596	0.890941	1.01956	0.95726
0.778055	0.681409	0.848791	1.00723	0.910696
0.806801	0.6835	0.805891	0.994954	0.867944
0.84043	0.693494	0.765926	0.979618	0.83053
0.880205	0.709496	0.731776	0.958067	0.798926
0.925379	0.729633	0.705549	0.928346	0.772758
0.972606	0.752597	0.688596	0.890941	0.751026
1.01754	0.778055	0.681409	0.848791	0.73239
1.05702	0.806801	0.6835	0.805891	0.715521
1.08983	0.84043	0.693494	0.765926	0.699451
1.11642	0.880205	0.709496	0.731776	0.683845
1.13817	0.925379	0.729633	0.705549	0.669187
1.15681	0.972606	0.752597	0.688596	0.656928
1.17398	1.01754	0.778055	0.681409	0.649658
1.19094	1.05702	0.806801	0.6835	0.651129
1.20841	1.08983	0.84043	0.693494	0.665532
1.22659	1.11642	0.880205	0.709496	0.695527
1.24521	1.13817	0.925379	0.729633	0.740019
1.26366	1.15681	0.972606	0.752597	0.794078
1.2809	1.17398	1.01754	0.778055	0.85145
1.29504	1.19094	1.05702	0.806801	0.907145
1.30277	1.20841	1.08983	0.84043	0.958309
1.29939	1.22659	1.11642	0.880205	1.00381
1.28106	1.24521	1.13817	0.925379	1.0435
1.24759	1.26366	1.15681	0.972606	1.07767
1.20226	1.2809	1.17398	1.01754	1.10667
1.14951	1.29504	1.19094	1.05702	1.13085
1.09314	1.30277	1.20841	1.08983	1.15054
1.03572	1.29939	1.22659	1.11642	1.16616
0.978763	1.28106	1.24521	1.13817	1.17837
0.923032	1.24759	1.26366	1.15681	1.18825
0.868825	1.20226	1.2809	1.17398	1.19742
0.81625	1.14951	1.29504	1.19094	1.20802
0.76538	1.09314	1.30277	1.20841	1.22202
0.716333	1.03572	1.29939	1.22659	1.23996
0.669294	0.978763	1.28106	1.24521	1.2594
0.624517	0.923032	1.24759	1.26366	1.27456
0.58236	0.868825	1.20226	1.2809	1.27862
0.543381	0.81625	1.14951	1.29504	1.26727
0.508471	0.76538	1.09314	1.30277	1.24038
0.478978	0.716333	1.03572	1.29939	1.20082
0.456826	0.669294	0.978763	1.28106	1.15244
0.444659	0.624517	0.923032	1.24759	1.09886
0.445853	0.58236	0.868825	1.20226	1.04298
0.463968	0.543381	0.81625	1.14951	0.986963
0.501258	0.508471	0.76538	1.09314	0.932315
0.556657	0.478978	0.716333	1.03572	0.879989
0.624931	0.456826	0.669294	0.978763	0.830454
0.69827	0.444659	0.624517	0.923032	0.783706
0.769144	0.445853	0.58236	0.868825	0.739307
0.832221	0.463968	0.543381	0.81625	0.696554
0.884677	0.501258	0.508471	0.76538	0.654873
0.925615	0.556657	0.478978	0.716333	0.61427
0.95533	0.624931	0.456826	0.669294	0.575514
0.974761	0.69827	0.444659	0.624517	0.53994
0.985187	0.769144	0.445853	0.58236	0.509203
0.988098	0.832221	0.463968	0.543381	0.485283
0.985171	0.884677	0.501258	0.508471	0.470695
0.978331	0.925615	0.556657	0.478978	0.468641
0.969835	0.95533	0.624931	0.456826	0.482678
0.962373	0.974761	0.69827	0.444659	0.515417
0.959055	0.985187	0.769144	0.445853	0.566444
0.963096	0.988098	0.832221	0.463968	0.631138
0.977089	0.985171	0.884677	0.501258	0.702081
1.00198	0.978331	0.925615	0.556657	0.771995
1.03596	0.969835	0.95533	0.624931	0.8357
1.07387	0.962373	0.974761	0.69827	0.890336
1.1083	0.959055	0.985187	0.769144	0.93471
1.13299	0.963096	0.988098	0.832221	0.968617
1.1457	0.977089	0.985171	0.884677	0.992465
1.148	1.00198	0.978331	0.925615	1.00712
1.14331	1.03596	0.969835	0.95533	1.01383
1.13524	1.07387	0.962373	0.974761	1.01415
1.12686	1.1083	0.959055	0.985187	1.00994
1.12037	1.13299	0.963096	0.988098	1.00336
1.11701	1.1457	0.977089	0.985171	0.99703
1.11703	1.148	1.00198	0.978331	0.993953
1.11966	1.14331	1.03596	0.969835	0.997333
1.12318	1.13524	1.07387	0.962373	1.00987
1.12498	1.12686	1.1083	0.959055	1.03269
1.12163	1.12037	1.13299	0.963096	1.06427
1.1093	1.11701	1.1457	0.977089	1.09964
1.08509	1.11703	1.148	1.00198	1.13139
1.04907	1.11966	1.14331	1.03596	1.15278
1.0048	1.12318	1.13524	1.07387	1.16097
0.95726	1.12498	1.12686	1.1083	1.15724
0.910696	1.12163	1.12037	1.13299	1.14513
0.867944	1.1093	1.11701	1.1457	1.1286
0.83053	1.08509	1.11703	1.148	1.11106
0.798926	1.04907	1.11966	1.14331	1.09507
0.772758	1.0048	1.12318	1.13524	1.08222
0.751026	0.95726	1.12498	1.12686	1.07311
0.73239	0.910696	1.12163	1.12037	1.06728
0.715521	0.867944	1.1093	1.11701	1.06317
0.699451	0.83053	1.08509	1.11703	1.05817
0.683845	0.798926	1.04907	1.11966	1.04886
0.669187	0.772758	1.0048	1.12318	1.03165
0.656928	0.751026	0.95726	1.12498	1.0042
0.649658	0.73239	0.910696	1.12163	0.967008
0.651129	0.715521	0.867944	1.1093	0.92352
0.665532	0.699451	0.83053	1.08509	0.878284
0.695527	0.683845	0.798926	1.04907	0.835259
0.740019	0.669187	0.772758	1.0048	0.797272
0.794078	0.656928	0.751026	0.95726	0.766087
0.85145	0.649658	0.73239	0.910696	0.742534
0.907145	0.651129	0.715521	0.867944	0.726562
0.958309	0.665532	0.699451	0.83053	0.717315
1.00381	0.695527	0.683845	0.798926	0.713345
1.0435	0.740019	0.669187	0.772758	0.712976
1.07767	0.794078	0.656928	0.751026	0.714746
1.10667	0.85145	0.649658	0.73239	0.717848
1.13085	0.907145	0.651129	0.715521	0.7225
1.15054	0.958309	0.665532	0.699451	0.73019
1.16616	1.00381	0.695527	0.683845	0.743704
1.17837	1.0435	0.740019	0.669187	0.766493
1.18825	1.07767	0.794078	0.656928	0.800868
1.19742	1.10667	0.85145	0.649658	0.845766
1.20802	1.13085	0.907145	0.651129	0.896581
1.22202	1.15054	0.958309	0.665532	0.947683
1.23996	1.16616	1.00381	0.695527	0.994974
1.2594	1.17837	1.0435	0.740019	1.0366
1.27456	1.18825	1.07767	0.794078	1.07243
1.27862	1.19742	1.10667	0.85145	1.10321
1.26727	1.20802	1.13085	0.907145	1.13
1.24038	1.22202	1.15054	0.958309	1.15375
1.20082	1.23996	1.16616	1.00381	1.1752
1.15244	1.2594	1.17837	1.0435	1.19483
1.09886	1.27456	1.18825	1.07767	1.21296
1.04298	1.27862	1.19742	1.10667	1.22991
0.986963	1.26727	1.20802	1.13085	1.2461
0.932315	1.24038	1.22202	1.15054	1.2621
0.879989	1.20082	1.23996	1.16616	1.27833
0.830454	1.15244	1.2594	1.17837	1.29418
0.783706	1.09886	1.27456	1.18825	1.3066
0.739307	1.04298	1.27862	1.19742	1.31002
0.696554	0.986963	1.26727	1.20802	1.29921
0.654873	0.932315	1.24038	1.22202	1.27264
0.61427	0.879989	1.20082	1.23996	1.23263
0.575514	0.830454	1.15244	1.2594	1.18309
0.53994	0.783706	1.09886	1.27456	1.12771
0.509203	0.739307	1.04298	1.27862	1.06934
0.485283	0.696554	0.986963	1.26727	1.00997
0.470695	0.654873	0.932315	1.24038	0.950984
0.468641	0.61427	0.879989	1.20082	0.893301
0.482678	0.575514	0.830454	1.15244	0.837538
0.515417	0.53994	0.783706	1.09886	0.784078
0.566444	0.509203	0.739307	1.04298	0.733117
0.631138	0.485283	0.696554	0.986963	0.684694
0.702081	0.470695	0.654873	0.932315	0.638765
0.771995	0.468641	0.61427	0.879989	0.595348
0.8357	0.482678	0.575514	0.830454	0.554735
0.890336	0.515417	0.53994	0.783706	0.517639
0.93471	0.566444	0.509203	0.739307	0.485198
0.968617	0.631138	0.485283	0.696554	0.45897
0.992465	0.702081	0.470695	0.654873	0.441082
1.00712	0.771995	0.468641	0.61427	0.434441
1.01383	0.8357	0.482678	0.575514	0.442708
1.01415	0.890336	0.515417	0.53994	0.469453
1.00994	0.93471	0.566444	0.509203	0.516126
1.00336	0.968617	0.631138	0.485283	0.579783
0.99703	0.992465	0.702081	0.470695	0.653062
0.993953	1.00712	0.771995	0.468641	0.727176
0.997333	1.01383	0.8357	0.482678	0.795159
1.00987	1.01415	0.890336	0.515417	0.853031
1.03269	1.00994	0.93471	0.566444	0.899283
1.06427	1.00336	0.968617	0.631138	0.933919
1.09964	0.99703	0.992465	0.702081	0.957724
1.13139	0.993953	1.00712	0.771995	0.971874
1.15278	0.997333	1.01383	0.8357	0.977772
1.16097	1.00987	1.01415	0.890336	0.977003
1.15724	1.03269	1.00994	0.93471	0.971346
1.14513	1.06427	1.00336	0.968617	0.962836
1.1286	1.09964	0.99703	0.992465	0.953876
1.11106	1.13139	0.993953	1.00712	0.947336
1.09507	1.15278	0.997333	1.01383	0.946488
1.08222	1.16097	1.00987	1.01415	0.954518
1.07311	1.15724	1.03269	1.00994	0.973559
1.06728	1.14513	1.06427	1.00336	1.00348
1.06317	1.1286	1.09964	0.99703	1.04089
1.05817	1.11106	1.13139	0.993953	1.07928
1.04886	1.09507	1.15278	0.997333	1.11142
1.03165	1.08222	1.16097	1.00987	1.13282
1.0042	1.07311	1.15724	1.03269	1.14314
0.967008	1.06728	1.14513	1.06427	1.14488
0.92352	1.06317	1.1286	1.09964	1.14152
0.878284	1.05817	1.11106	1.13139	1.13635
0.835259	1.04886	1.09507	1.15278	1.13196
0.797272	1.03165	1.08222	1.16097	1.13002
0.766087	1.0042	1.07311	1.15724	1.13125
0.742534	0.967008	1.06728	1.14513	1.13542
0.726562	0.92352	1.06317	1.1286	1.14133
0.717315	0.878284	1.05817	1.11106	1.14695
0.713345	0.835259	1.04886	1.09507	1.1494
0.712976	0.797272	1.03165	1.08222	1.14501
0.714746	0.766087	1.0042	1.07311	1.12988
0.717848	0.742534	0.967008	1.06728	1.10183
0.7225	0.726562	0.92352	1.06317	1.0623
0.73019	0.717315	0.878284	1.05817	1.01578
0.743704	0.713345	0.835259	1.04886	0.967238
0.766493	0.712976	0.797272	1.03165	0.920419
0.800868	0.714746	0.766087	1.0042	0.877581
0.845766	0.717848	0.742534	0.967008	0.83974
0.896581	0.7225	0.726562	0.92352	0.806944
0.947683	0.73019	0.717315	0.878284	0.778525
0.994974	0.743704	0.713345	0.835259	0.753374
1.0366	0.766493	0.712976	0.797272	0.730257
1.07243	0.800868	0.714746	0.766087	0.708145
1.10321	0.845766	0.717848	0.742534	0.686482
1.13	0.896581	0.7225	0.726562	0.665349
1.15375	0.947683	0.73019	0.717315	0.645571
1.1752	0.994974	0.743704	0.713345	0.628854
1.19483	1.0366	0.766493	0.712976	0.617984
1.21296	1.07243	0.800868	0.714746	0.616832
1.22991	1.10321	0.845766	0.717848	0.629575
1.2461	1.13	0.896581	0.7225	0.658775
1.2621	1.15375	0.947683	0.73019	0.703319
[truncated: 3,482 more rows]
